# Supplementary material for: Коррупционные психологические тенденции в политической и корпоративной культуре граждан Украины и Польши
Source: Springer Nature journal article supplement (doi:10.1186/s12916-023-02951-2), 2014-01-01
Supplement: MOESM1 [file 25537822]

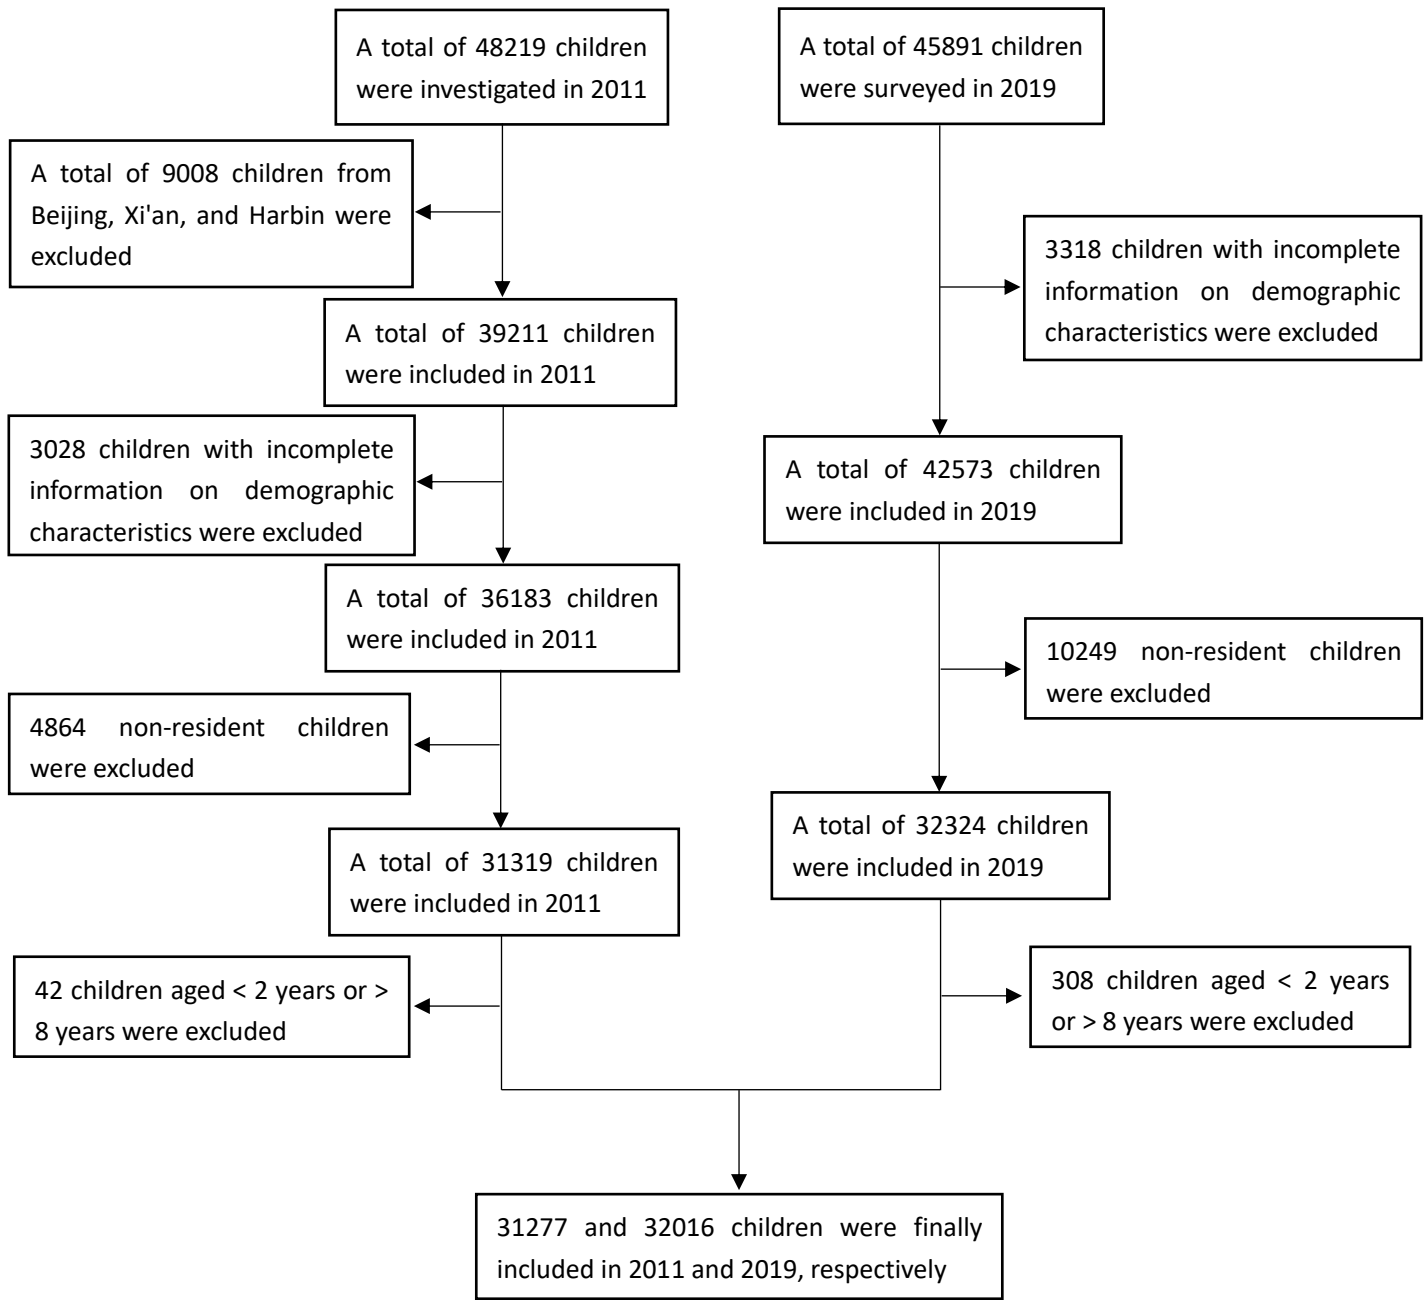

**Figure S1: Flowchart of this study.**

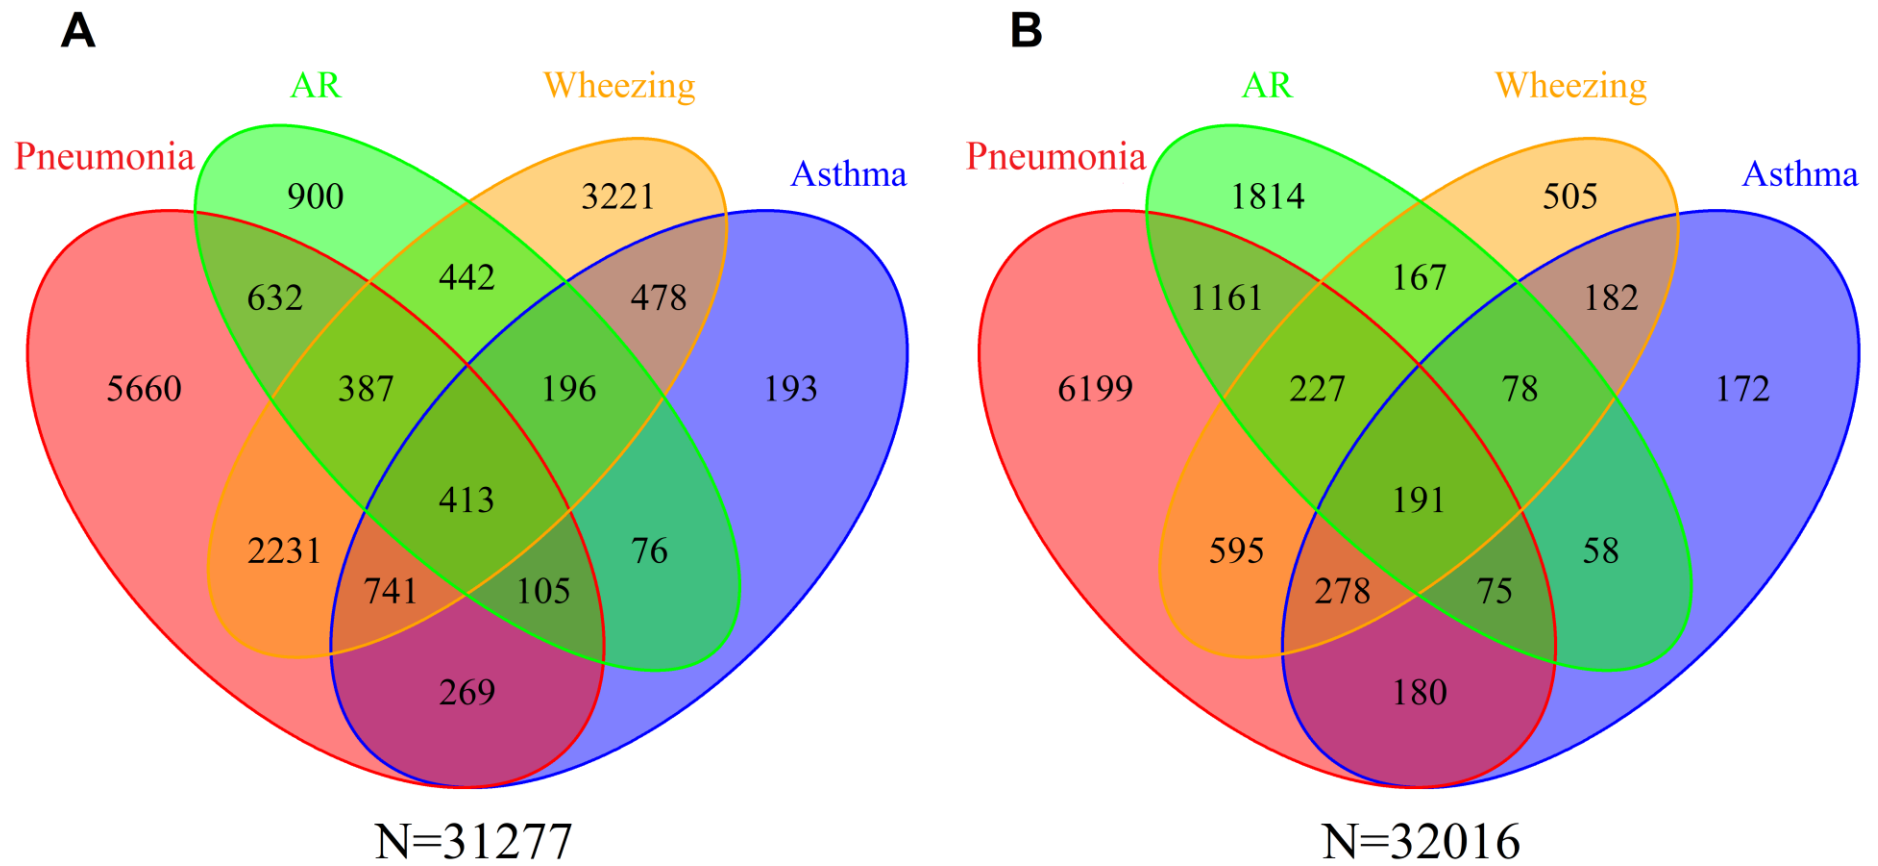

**Figure S2: Cross-prevalence of pneumonia, asthma, allergic rhinitis and wheezing among preschool children in the Chinese seven cities in 2011 and 2019.**
