# Supplementary material for: Коррупционные психологические тенденции в политической и корпоративной культуре граждан Украины и Польши
Source: Springer Nature journal article supplement (doi:10.1186/s12916-023-02951-2), 2014-01-01
Supplement: MOESM2 [file 25537822]

## Supplementary Text

### Performance of the ISAAC and DBH screening questionnaire items in investigate influencing factors of respiratory and allergic diseases

International Study of Asthma and Allergies in Childhood (ISAAC)<sup>1</sup> and Dampness in Building and health (DBH)<sup>2</sup> screening questionnaire have been verified by relevant research institutes,<sup>3-5</sup> and have been translated into Chinese and used in research group China, Children, Homes, Health (CCHH), and we conducted a follow-up survey on 300 respondents in Chongqing and collected 206 copies. The short questionnaire contains five questions, including home address, gender, wheezing in the past 12 months, whether there are visible wet spots at home and family smoking. The results showed that there was no significant difference between the short questionnaire participants and the long questionnaire participants (Table).<sup>6</sup> Of course, this survey has unavoidable limitations of all questionnaires. The collected data analyzed depends on the parents' retrospective reports, which may contain bias caused by memory bias. For discussion of some biases, please refer to the research results of each city.<sup>7-16</sup>

**Table: Comparison of long questionnaire and short questionnaire in Chongqing in 2011<sup>[6]</sup>**

|                                | short questionnaire | long questionnaire | p value |
|--------------------------------|---------------------|--------------------|---------|
| Sample size                    | 206                 | 5299               |         |
| Questionnaire recovery rate    | 68.7                | 74.5               |         |
| Residential location           |                     |                    | 0.070   |
| Rural                          | 11.2                | 10.4               |         |
| Suburb                         | 24.7                | 18.7               |         |
| Urban                          | 54.1                | 70.9               |         |
| Gender                         |                     |                    | 0.478   |
| Boys                           | 53.9                | 51.3               |         |
| Gils                           | 46.1                | 48.7               |         |
| Wheezing in the past 12 months | 26.3                | 20.6               | 0.054   |
| Visible wet spots at home      | 10.8                | 8.1                | 0.181   |
| Members of the family smoke    | 71.4                | 65.6               | 0.099   |

- [1] Asher M, Keil U, Anderson H, et al. International Study of Asthma and Allergies in Childhood (ISAAC): Rationale and methods. *Eur Respir J.* 1995;8:483-91.
- [2] Bornehag CG, Sundell J, Sigsgaard T. Dampness in buildings and health (DBH): Report from an ongoing epidemiological investigation on the association between indoor environmental factors and health effects among children in Sweden. *Indoor Air.* 2004;14:59-66.
- [3] Chan HH, Pei A, Van Krevel C, et al. Validation of the Chinese translated version of ISAAC core questions for atopic eczema. *Clin Exp Allergy.* 2001;31:903–7.
- [4] Sun YX, Sundell J, Zhang YF. Validity of building characteristics and dorm dampness obtained in a self-administrated questionnaire. *Sci Total Environ.* 2007;387:276–82 .
- [5] Engman LH, Bornehag CG, Sundell J. How valid are parents' questionnaire responses regarding building characteristics, mouldy odour, and signs of moisture problems in Swedish homes?. *Scand J Public Health.* 2007;35:125–32.
- [6] Zhang YP, Li BZ, Huang C, et al. Ten cities cross-sectional questionnaire survey of children asthma and other allergies in China. *Chinese Sci Bull.* 2013;58:4182-9.
- [7] Zhao ZH, Zhang X, Liu RR, et al. Prenatal and early life home environment exposure in relation to preschool children's asthma, allergic rhinitis and eczema in Taiyuan, China. *Chinese Sci Bull.* 2013;58:4245-51.
- [8] Wang TT, Zhao ZH, Yao H, et al. Housing characteristics and indoor environment in relation to children's asthma, allergic diseases and pneumonia in Urumqi, China. *Chinese Sci Bull.* 2013;58:4237-44.
- [9] Huang C, Hu Y, Liu W, et al. Pet-keeping and its impact on asthma and allergies among preschool children in Shanghai, China. *Chinese Sci Bull.* 2013;58:4203-10.
- [10] Liu W, Huang C, Hu Y, et al. Associations between indoor environmental smoke and respiratory symptoms among preschool children in Shanghai, China. *Chinese Sci Bull.* 2013;58:4211-6.
- [11] Zhang M, Wu Y, Yuan Y, et al. Effects of home environment and lifestyles on prevalence of atopic eczema among children in Wuhan area of China. *Chinese Sci Bull.* 2013;58:4217-22.
- [12] Zhang M, Zhou ES, Ye X, et al. Indoor environmental quality and the prevalence of childhood asthma and rhinitis in Wuhan area of China. *Chinese Sci Bull.* 2013;58:4223-9.
- [13] Zheng XH, Qian H, Zhao YL, et al. Home risk factors for childhood pneumonia in Nanjing, China. *Chinese Sci Bull* 2013;58:4230-6.
- [14] Lu C, Deng Q H, Ou CY, et al. Effects of ambient air pollution on allergic rhinitis among preschool children in Changsha, China. *Chinese Sci Bull.*

2013;58:4252-8.

[15] Wang H, Li BZ, Yang Q, et al. Dampness in dwellings and its associations with asthma and allergies among children in Chongqing: A cross-sectional study. Chinese Sci Bull. 2013;58:4259-66.

[16] Wang J, Li BZ, Yang Q, et al. Sick building syndrome among parents of preschool children in relation to home environment in Chongqing, China. Chinese Sci Bull. 2013;58:4267-76.

**Table S1: Age-specific and age-adjusted prevalence of pneumonia among preschool children in the Chinese seven cities in 2011 and 2019 by gender**

|                           | 2011             |                  |                  | 2019             |                  |                  |
|---------------------------|------------------|------------------|------------------|------------------|------------------|------------------|
|                           | Boys             | Girls            | Total            | Boys             | Girls            | Total            |
| Age (years)               |                  |                  |                  |                  |                  |                  |
| 2-4                       | 34.3%(32.3-36.3) | 29.1%(27.1-31.1) | 31.7%(30.3-33.2) | 29.1%(27.7-30.6) | 25.6%(24.2-27.1) | 27.5%(26.4-28.5) |
| 4-6                       | 35.7%(34.8-36.7) | 32.8%(31.8-33.7) | 34.3%(33.6-35.0) | 29.1%(28.2-30.0) | 26.7%(25.8-27.6) | 27.9%(27.3-28.5) |
| 6-8                       | 33.8%(32.3-35.2) | 30.1%(28.6-31.6) | 32.0%(31.0-33.1) | 29.7%(28.1-31.4) | 26.1%(24.4-27.8) | 28.0%(26.8-29.2) |
| p value for trend         | 0.3290           | 0.8560           | 0.4410           | 0.6318           | 0.5686           | 0.4490           |
| Urbanisation              |                  |                  |                  |                  |                  |                  |
| Urban                     | 35.6%(34.8-36.5) | 31.7%(30.9-32.6) | 33.7%(33.1-34.3) | 29.0%(28.3-29.8) | 26.0%(25.3-26.8) | 27.6%(27.1-28.2) |
| Suburb                    | 32.2%(30.6-33.8) | 28.8%(27.2-30.4) | 30.6%(29.4-31.7) | 31.0%(29.2-32.8) | 27.1%(25.3-28.9) | 29.2%(27.9-30.5) |
| Rural                     | 25.4%(21.9-29.1) | 21.5%(18.0-25.4) | 23.6%(21.1-26.2) | 27.2%(23.7-30.8) | 23.5%(19.8-27.5) | 25.6%(23.0-28.2) |
| p value for difference    | <0.0001          | <0.0001          | <0.0001          | 0.0680           | 0.2406           | 0.0169           |
| Duration of breastfeeding |                  |                  |                  |                  |                  |                  |
| <6 months                 | 37.8%(36.7-38.8) | 32.9%(31.8-34.0) | 35.4%(34.7-36.2) | 31.3%(30.2-32.5) | 27.4%(26.2-28.6) | 29.5%(28.7-30.3) |
| ≥6 months                 | 31.5%(30.5-32.5) | 28.5%(27.4-29.5) | 30.0%(29.3-30.8) | 28.0%(27.2-28.9) | 25.4%(24.5-26.2) | 26.7%(26.1-27.4) |
| p value for difference    | <0.0001          | <0.0001          | <0.0001          | <0.0001          | 0.0061           | <0.0001          |
| Premature birth           |                  |                  |                  |                  |                  |                  |

|                             |           |                  |                  |                  |                  |                  |                  |
|-----------------------------|-----------|------------------|------------------|------------------|------------------|------------------|------------------|
|                             | Yes       | 35.4%(31.8-39.0) | 34.5%(30.6-38.5) | 32.6%(32.1-33.1) | 29.1%(28.4-29.8) | 34.7%(29.1-40.5) | 36.2%(32.5-40.0) |
|                             | No        | 34.5%(33.8-35.3) | 30.5%(29.8-31.3) | 34.9%(32.3-37.6) | 37.5%(32.5-42.6) | 26.0%(25.3-26.7) | 27.6%(27.1-28.1) |
| p value for difference      |           | 0.6800           | 0.0468           | 0.0922           | 0.0006           | 0.0012           | <0.0001          |
| Birth weight (g)            |           |                  |                  |                  |                  |                  |                  |
|                             | <2500     | 35.0%(31.0-39.0) | 34.8%(31.4-38.4) | 34.9%(32.3-37.6) | 34.0%(30.1-38.1) | 30.5%(26.8-34.5) | 32.3%(29.6-35.1) |
|                             | 2500-4000 | 34.9%(34.1-35.7) | 30.5%(29.8-31.3) | 32.8%(32.2-33.3) | 29.3%(28.5-30.1) | 26.3%(25.5-27.1) | 27.8%(27.3-28.4) |
|                             | ≥ 4000    | 31.1%(28.7-33.7) | 29.0%(25.9-32.2) | 30.3%(28.4-32.3) | 28.6%(27.1-30.2) | 24.1%(22.3-25.9) | 26.9%(25.7-28.0) |
| p value for trend           |           | 0.0195           | 0.0143           | 0.0036           | 0.0566           | 0.0019           | 0.0030           |
| Parental smoking            |           |                  |                  |                  |                  |                  |                  |
|                             | None      | 33.0%(32.0-34.0) | 30.2%(29.2-31.2) | 31.6%(30.9-32.3) | 27.1%(26.3-27.9) | 24.7%(23.9-25.5) | 25.9%(25.4-26.5) |
|                             | One       | 36.4%(35.3-37.5) | 31.2%(30.1-32.3) | 33.9%(33.1-34.7) | 34.7%(33.3-36.1) | 29.6%(28.3-31.0) | 32.3%(31.3-33.3) |
|                             | Two       | 36.7%(27.0-47.3) | 31.8%(21.9-43.1) | 34.3%(27.3-41.8) | 32.9%(21.8-45.6) | 29.2%(17.4-43.4) | 31.6%(23.4-40.8) |
| p value for trend           |           | <0.0001          | 0.1650           | <0.0001          | <0.0001          | <0.0001          | <0.0001          |
| Used antibiotics            |           |                  |                  |                  |                  |                  |                  |
|                             | Yes       | 39.8%(39.0-40.7) | 35.5%(34.7-36.4) | 37.8%(37.2-38.4) | 10.1%(9.2-11.0)  | 8.9%(8.0-9.8)    | 9.5%(8.9-10.2)   |
|                             | No        | 16.8%(15.6-18.0) | 15.2%(14.1-16.4) | 16.0%(15.2-16.9) | 36.2%(35.4-37.1) | 32.5%(31.7-33.4) | 34.5%(33.9-35.1) |
| p value for difference      |           | <0.0001          | <0.0001          | <0.0001          | <0.0001          | <0.0001          | <0.0001          |
| History of parental asthma  |           |                  |                  |                  |                  |                  |                  |
|                             | None      | 34.2%(33.5-35.0) | 30.3%(29.6-31.1) | 32.3%(31.8-32.9) | 28.9%(28.2-29.6) | 25.9%(25.2-26.6) | 27.5%(27.0-28.0) |
|                             | One       | 45.6%(41.1-50.1) | 41.9%(37.1-46.8) | 43.9%(40.6-47.1) | 47.3%(42.1-52.5) | 35.8%(30.3-41.6) | 42.2%(38.4-46.0) |
|                             | Two       | 19.4%(1.2-62.9)  | 65.6%(37.3-87.5) | 49.1%(27.5-71.0) | 25.9%(13.1-42.6) | 19.2%(9.2-33.4)  | 22.3%(13.9-32.6) |
| p value for trend           |           | <0.0001          | <0.0001          | <0.0001          | <0.0001          | 0.0204           | <0.0001          |
| History of parental allergy |           |                  |                  |                  |                  |                  |                  |
|                             | None      | 33.1%(32.4-33.9) | 29.5%(28.7-30.3) | 31.4%(30.8-31.9) | 26.2%(25.4-27.0) | 23.2%(22.4-24.0) | 24.8%(24.2-25.3) |
|                             | One       | 46.3%(43.8-48.8) | 41.0%(38.4-43.6) | 43.8%(42.0-45.6) | 36.1%(34.6-37.5) | 32.7%(31.2-34.3) | 34.5%(33.5-35.6) |
|                             | Two       | 55.4%(47.4-63.2) | 41.2%(33.0-49.8) | 48.6%(42.9-54.4) | 39.0%(35.5-42.5) | 35.5%(32.0-39.1) | 37.3%(34.8-39.8) |

|                                          |                      |                  |                  |                  |                  |                  |                  |
|------------------------------------------|----------------------|------------------|------------------|------------------|------------------|------------------|------------------|
| p value for trend                        |                      | <0.0001          | <0.0001          | <0.0001          | <0.0001          | <0.0001          | <0.0001          |
| Residence area                           |                      |                  |                  |                  |                  |                  |                  |
|                                          | <75m <sup>2</sup>    | 34.3%(33.2-35.5) | 29.6%(28.5-30.8) | 32.1%(31.2-32.9) | 29.2%(27.8-30.6) | 25.3%(23.9-26.8) | 27.3%(26.3-28.3) |
|                                          | ≥75m <sup>2</sup>    | 34.8%(33.8-35.7) | 31.3%(30.3-32.2) | 33.1%(32.4-33.8) | 29.4%(28.6-30.2) | 26.4%(25.6-27.2) | 27.9%(27.4-28.5) |
| p value for difference                   |                      | 0.5830           | 0.0348           | 0.0609           | 0.8401           | 0.2296           | 0.2811           |
| Frequency of putting bedding to sunshine |                      |                  |                  |                  |                  |                  |                  |
|                                          | Never                | 38.3%(34.0-42.8) | 34.0%(29.9-38.3) | 36.2%(33.2-39.2) | 26.5%(22.4-30.8) | 23.8%(19.7-28.3) | 25.1%(22.2-28.2) |
|                                          | Sometimes            | 37.0%(35.7-38.4) | 34.1%(32.8-35.5) | 35.6%(34.7-36.6) | 32.6%(31.4-33.8) | 28.7%(27.5-29.9) | 30.7%(29.9-31.6) |
|                                          | Often                | 33.2%(32.3-34.1) | 28.7%(27.8-29.6) | 31.0%(30.4-31.6) | 27.6%(26.8-28.5) | 24.8%(24.0-25.7) | 26.3%(25.7-26.9) |
| p value for trend                        |                      | <0.0001          | <0.0001          | <0.0001          | <0.0001          | 0.0001           | <0.0001          |
| Frequency of clean children's rooms      |                      |                  |                  |                  |                  |                  |                  |
|                                          | Rarely               | 32.2%(26.1-38.8) | 29.3%(23.3-36.0) | 30.8%(26.5-35.4) | 30.8%(26.5-35.4) | 28.6%(24.1-33.4) | 29.8%(26.7-33.0) |
|                                          | Sometimes            | 35.9%(34.0-37.8) | 32.9%(31.0-34.8) | 34.4%(33.1-35.8) | 31.8%(30.2-33.5) | 28.3%(26.6-29.9) | 30.1%(29.0-31.3) |
|                                          | Often                | 34.4%(33.6-35.2) | 30.3%(29.5-31.1) | 32.4%(31.8-33.0) | 28.7%(27.9-29.5) | 25.5%(24.8-26.3) | 27.2%(26.6-27.7) |
| p value for trend                        |                      | 0.4010           | 0.0550           | 0.0533           | 0.0015           | 0.0022           | <0.0001          |
| Cooking fuel type                        |                      |                  |                  |                  |                  |                  |                  |
|                                          | Natural gas/coal gas | 35.3%(34.5-36.2) | 31.3%(30.5-32.2) | 33.4%(32.8-34.0) | 29.7%(29.0-30.4) | 26.3%(25.6-27.0) | 28.1%(27.6-28.6) |
|                                          | Coal                 | 37.2%(34.1-40.3) | 30.5%(27.6-33.6) | 33.9%(31.8-36.1) | 34.7%(23.1-47.9) | 37.6%(23.7-53.3) | 36.9%(27.8-46.8) |
|                                          | Electricity          | 28.9%(26.9-30.9) | 26.2%(24.3-28.3) | 27.6%(26.2-29.0) | 23.9%(20.8-27.1) | 24.1%(21.0-27.4) | 24.0%(21.8-26.2) |
|                                          | Wood                 | 27.8%(18.8-38.3) | 24.0%(15.8-33.9) | 25.8%(19.7-32.8) | 23.3%(3.7-59.0)  | 33.3%(1.9-85.5)  | 29.2%(8.7-58.7)  |
|                                          | Other                | 36.5%(33.0-40.1) | 33.3%(29.7-37.0) | 34.9%(32.4-37.5) | 10.0%(5.2-17.0)  | 12.2%(6.1-21.2)  | 11.0%(7.0-16.2)  |
| p value for difference                   |                      | <0.0001          | 0.0001           | <0.0001          | <0.0001          | 0.0099           | <0.0001          |
| Indoor dampness                          |                      |                  |                  |                  |                  |                  |                  |
|                                          | Yes                  | 41.4%(39.3-43.5) | 37.5%(35.3-39.6) | 39.5%(38.0-41.0) | 35.3%(33.4-37.3) | 32.2%(30.3-34.2) | 33.9%(32.5-35.2) |

|                                      |                                     |                  |                  |                  |                  |                  |                  |
|--------------------------------------|-------------------------------------|------------------|------------------|------------------|------------------|------------------|------------------|
|                                      | No                                  | 33.6%(32.8-34.3) | 29.7%(28.9-30.4) | 31.7%(31.1-32.2) | 28.3%(27.6-29.1) | 25.1%(24.4-25.9) | 26.8%(26.3-27.3) |
| p value for difference               |                                     | <0.0001          | <0.0001          | <0.0001          | <0.0001          | <0.0001          | <0.0001          |
| Home interior decoration             |                                     |                  |                  |                  |                  |                  |                  |
|                                      | Yes                                 | 37.7%(35.9-39.5) | 34.0%(32.1-35.8) | 35.9%(34.6-37.2) | 27.7%(25.7-29.8) | 24.4%(22.3-26.6) | 26.2%(24.7-27.7) |
|                                      | No                                  | 33.9%(33.1-34.7) | 29.9%(29.1-30.7) | 32.0%(31.4-32.6) | 29.5%(28.7-30.2) | 26.3%(25.6-27.1) | 28.0%(27.4-28.5) |
| p value for difference               |                                     | 0.0001           | <0.0001          | 0.0001           | 0.1217           | 0.0914           | 0.0265           |
| Home interior purchase new furniture |                                     |                  |                  |                  |                  |                  |                  |
|                                      | Yes                                 | 36.2%(34.9-37.4) | 33.0%(31.7-34.3) | 31.7%(31.0-32.3) | 29.3%(27.9-30.8) | 24.9%(23.5-26.5) | 27.3%(26.2-28.4) |
|                                      | No                                  | 33.8%(32.9-34.7) | 29.4%(28.5-30.3) | 34.6%(33.7-35.5) | 29.2%(28.5-30.0) | 26.4%(25.6-27.2) | 27.9%(27.3-28.4) |
| p value for difference               |                                     | 0.0024           | <0.0001          | <0.0001          | 0.9544           | 0.0898           | 0.3308           |
| Wall painting materials              |                                     |                  |                  |                  |                  |                  |                  |
|                                      | Wall paper                          | 31.4%(29.1-33.8) | 33.2%(30.8-35.7) | 32.3%(30.6-34.0) | 28.2%(26.8-29.6) | 26.3%(24.9-27.7) | 27.3%(26.3-28.3) |
|                                      | Emulsion paint                      | 36.4%(35.4-37.3) | 31.2%(30.2-32.1) | 33.8%(33.1-34.5) | 31.1%(30.0-32.3) | 26.8%(25.7-28.0) | 29.1%(28.3-29.9) |
|                                      | Paint                               | 38.0%(35.7-40.3) | 33.0%(30.7-35.3) | 35.6%(34.0-37.2) | 27.0%(22.9-31.5) | 28.6%(23.8-33.8) | 27.7%(24.6-31.0) |
|                                      | Wood                                | 22.2%(16.0-29.5) | 23.9%(17.7-30.9) | 23.0%(18.6-27.9) | 12.2%(7.0-19.4)  | 17.1%(9.7-27.0)  | 14.5%(10.0-20.1) |
|                                      | Lime / cement                       | 29.8%(28.0-31.7) | 27.1%(25.2-29.0) | 28.6%(27.3-29.9) | 24.0%(19.7-28.6) | 24.8%(20.3-29.8) | 24.4%(21.3-27.7) |
|                                      | Other                               | 30.4%(27.3-33.6) | 27.1%(24.2-30.3) | 28.9%(26.7-31.1) | 28.7%(27.4-29.9) | 25.1%(23.8-26.4) | 27.0%(26.1-27.9) |
| p value for difference               |                                     | <0.0001          | <0.0001          | <0.0001          | <0.0001          | 0.1028           | <0.0001          |
| Flooring materials                   |                                     |                  |                  |                  |                  |                  |                  |
|                                      | Solid wood / multi-layer solid wood | 34.0%(32.9-35.1) | 30.2%(29.1-31.2) | 32.1%(31.4-32.9) | 27.8%(26.7-28.9) | 26.5%(25.4-27.6) | 27.2%(26.4-27.9) |
|                                      | Laminate / Composite wood           | 38.9%(37.3-40.5) | 34.8%(33.2-36.5) | 37.0%(35.9-38.1) | 31.8%(30.6-33.1) | 27.6%(26.3-28.8) | 29.8%(28.9-30.7) |
|                                      | Bamboo                              | 32.4%(26.3-38.9) | 27.3%(21.5-33.6) | 30.0%(25.8-34.5) | 27.1%(19.8-35.5) | 20.5%(14.2-28.0) | 23.9%(19.0-29.3) |
|                                      | Ceramic tile / stone / cement       | 32.2%(30.8-33.6) | 28.2%(26.8-29.7) | 30.4%(29.4-31.4) | 29.2%(27.8-30.6) | 24.4%(23.1-25.7) | 26.9%(25.9-27.8) |
|                                      | PVC / plastics / plastic            | 37.9%(31.2-45.1) | 21.8%(16.1-28.3) | 28.9%(24.5-33.7) | 29.4%(19.1-41.4) | 24.6%(11.2-43.0) | 27.9%(19.4-37.6) |

|                              |                 |                  |                  |                  |                  |                  |                  |
|------------------------------|-----------------|------------------|------------------|------------------|------------------|------------------|------------------|
|                              | leather         |                  |                  |                  |                  |                  |                  |
|                              | Other           | 32.3%(26.7-38.4) | 29.7%(24.2-35.6) | 30.9%(26.9-35.0) | 20.8%(16.4-25.7) | 22.8%(17.8-28.3) | 21.7%(18.3-25.3) |
| p value for difference       |                 | <0.0001          | <0.0001          | <0.0001          | <0.0001          | 0.0074           | <0.0001          |
| Indoor heating mode          |                 |                  |                  |                  |                  |                  |                  |
|                              | No heating      | 34.0%(31.9-36.0) | 27.6%(25.7-29.7) | 31.0%(29.5-32.4) | 28.6%(27.4-29.9) | 26.1%(24.8-27.5) | 27.5%(26.6-28.4) |
| Individual household heating |                 | 34.0%(33.1-34.9) | 30.8%(29.9-31.7) | 32.4%(31.8-33.1) | 30.5%(29.5-31.6) | 26.6%(25.6-27.6) | 28.7%(27.9-29.4) |
|                              | Central heating | 38.0%(36.4-39.7) | 33.0%(31.3-34.7) | 35.7%(34.5-36.9) | 28.1%(26.6-29.6) | 25.2%(23.8-26.7) | 26.7%(25.6-27.7) |
|                              | Other           | 29.1%(23.7-35.0) | 29.0%(23.8-34.7) | 29.1%(25.3-33.1) | 26.5%(23.1-30.1) | 24.9%(21.3-28.7) | 25.7%(23.2-28.3) |
| p value for difference       |                 | <0.0001          | 0.0010           | <0.0001          | 0.0098           | 0.4250           | 0.0052           |
| Indoor use air-conditioning  |                 |                  |                  |                  |                  |                  |                  |
|                              | Yes             | 33.6%(32.8-34.5) | 30.7%(29.8-31.6) | 33.4%(32.5-34.3) | 29.6%(28.8-30.4) | 26.4%(25.6-27.2) | 28.1%(27.5-28.6) |
|                              | No              | 36.2%(35.0-37.6) | 30.1%(28.8-31.4) | 32.2%(31.6-32.8) | 28.0%(26.5-29.6) | 25.0%(23.5-26.6) | 26.6%(25.5-27.7) |
| p value for difference       |                 | 0.0011           | 0.5000           | 0.0327           | 0.0789           | 0.1334           | 0.0193           |
| Indoor use air purifier      |                 |                  |                  |                  |                  |                  |                  |
|                              | Yes             | 36.3%(33.0-39.6) | 32.9%(29.7-36.3) | 34.7%(32.4-37.1) | 29.5%(28.4-30.7) | 26.9%(25.8-28.1) | 28.3%(27.5-29.1) |
|                              | No              | 34.5%(33.7-35.2) | 30.5%(29.8-31.3) | 32.6%(32.0-33.1) | 29.2%(28.3-30.1) | 25.8%(24.9-26.6) | 27.6%(26.9-28.2) |
| p value for difference       |                 | 0.3040           | 0.1600           | 0.0780           | 0.6483           | 0.1210           | 0.1681           |
| Indoor keeping furry pets    |                 |                  |                  |                  |                  |                  |                  |
|                              | Yes             | 34.4%(32.2-36.6) | 29.7%(27.6-31.9) | 32.1%(30.6-33.7) | 30.2%(28.1-32.4) | 28.7%(26.7-30.8) | 29.4%(28.0-30.9) |
|                              | No              | 34.6%(33.9-35.4) | 30.8%(30.0-31.6) | 32.8%(32.3-33.4) | 29.2%(28.5-29.9) | 25.7%(25.0-26.5) | 27.6%(27.1-28.1) |
| p value for difference       |                 | 0.8370           | 0.3520           | 0.4220           | 0.4000           | 0.0062           | 0.0179           |
| Asthma                       |                 |                  |                  |                  |                  |                  |                  |
|                              | Yes             | 62.2%(59.7-64.6) | 62.3%(59.1-65.4) | 62.2%(60.3-64.1) | 59.1%(55.5-62.6) | 60.0%(55.3-64.5) | 59.5%(56.6-62.2) |
|                              | No              | 31.9%(31.1-32.6) | 28.7%(27.9-29.4) | 30.3%(29.8-30.8) | 27.9%(27.2-28.6) | 25.0%(24.3-25.7) | 26.5%(26.0-27.0) |
| p value for difference       |                 | <0.0001          | <0.0001          | <0.0001          | <0.0001          | <0.0001          | <0.0001          |
| Allergic rhinitis            |                 |                  |                  |                  |                  |                  |                  |

|                        |     |                  |                  |                  |                  |                  |                  |
|------------------------|-----|------------------|------------------|------------------|------------------|------------------|------------------|
|                        | Yes | 49.6%(47.3-51.9) | 44.8%(42.0-47.5) | 47.6%(45.9-49.4) | 44.5%(42.4-46.6) | 43.5%(41.0-46.0) | 44.1%(42.5-45.7) |
|                        | No  | 32.7%(32.0-33.5) | 29.4%(28.6-30.2) | 31.1%(30.6-31.6) | 27.0%(26.3-27.8) | 24.2%(23.5-24.9) | 25.6%(25.1-26.2) |
| p value for difference |     | <0.0001          | <0.0001          | <0.0001          | <0.0001          | <0.0001          | <0.0001          |
| Wheezing               |     |                  |                  |                  |                  |                  |                  |
|                        | Yes | 48.2%(46.8-49.7) | 45.7%(44.1-47.4) | 47.1%(46.0-48.2) | 57.6%(55.0-60.3) | 57.1%(53.7-60.5) | 57.3%(55.2-59.4) |
|                        | No  | 29.9%(29.0-30.7) | 26.9%(26.1-27.7) | 28.4%(27.8-29.0) | 26.8%(26.0-27.5) | 24.3%(23.6-25.0) | 25.6%(25.1-26.1) |
| p value for difference |     | <0.0001          | <0.0001          | <0.0001          | <0.0001          | <0.0001          | <0.0001          |

Values are % (95% CI). p value for difference refers to the comparison of binary variables. Pneumonia, asthma, allergic rhinitis were defined as physician-diagnosed since birth of children. Wheezing was defined as parents reported that the child has great difficulty breathing or the respiratory muscles of the child are all involved in breathing, and the respiratory rate of the child is faster than normal since birth. Premature birth was defined as delivery under 37 weeks of pregnancy. Used antibiotics was defined as child has been injected or taken since birth, such as but not limited to penicillin, azithromycin, cephalosporin, etc. Parental smoking was defined as parents smoked equal to or more than 100 cigarettes in the lifetime. All calculations of p values are weighted, accounting for the number of people sampled in two surveys in 2011 and 2019 and based on the  $\chi^2$  test.

**Table S2: Multiple adjusted odds ratios of pneumonia in the Chinese seven cities of preschool children in 2011 and 2019 by duration of breastfeeding and antibiotics use**

|       | Duration of breastfeeding $\geq$ 6 months |                 | Never used antibiotics |                 | Used antibiotics |                 | Duration of breastfeeding $\geq$ 6 months |         | Never used antibiotics |         | Used antibiotics |         |
|-------|-------------------------------------------|-----------------|------------------------|-----------------|------------------|-----------------|-------------------------------------------|---------|------------------------|---------|------------------|---------|
|       | OR(95%CI)                                 | p value         | OR(95%CI)              | p value         | OR(95%CI)        | p value         | OR(95%CI)                                 | p value | OR(95%CI)              | p value | OR(95%CI)        | p value |
| Girls | 0.93(0.86-0.99)                           | 0.0350          | 0.94(0.83-1.07)        | 0.3437          | 0.91(0.86-0.96)  | 0.0004          | 0.96(0.90-1.02)                           | 0.1969  | 0.92(0.87-0.97)        | 0.0025  | 0.93(0.80-1.09)  | 0.3745  |
| Age   |                                           |                 |                        |                 |                  |                 | ..                                        | ..      | ..                     | ..      | ..               | ..      |
|       | 2-4                                       | 1.00            | 1.00                   |                 | 1.00             |                 | ..                                        | ..      | ..                     | ..      | ..               | ..      |
|       | 4-6                                       | 1.13(1.02-1.25) | 0.02                   | 1.15(0.94-1.41) | 0.17             | 1.11(1.02-1.21) | 0.01                                      | ..      | ..                     | ..      | ..               | ..      |



|                                           |                    |                        |            |                        |            |                        |            |                 |            |                 |            |                 |            |
|-------------------------------------------|--------------------|------------------------|------------|------------------------|------------|------------------------|------------|-----------------|------------|-----------------|------------|-----------------|------------|
|                                           | 6-8                | 26)<br>0.95(0.84-1.07) | 56<br>0.40 | 42)<br>0.92(0.73-1.16) | 16<br>0.49 | 20)<br>0.99(0.90-1.09) | 31<br>0.81 | ..              | ..         | ..              | ..         | ..              | ..         |
| Urbanisation                              |                    |                        |            |                        |            |                        |            |                 |            |                 |            |                 |            |
|                                           | Urban              | 1.00                   |            | 1.00                   |            | 1.00                   |            | 1.00            |            | 1.00            |            | 1.00            |            |
|                                           | Suburb             | 0.97(0.89-1.06)        | 0.53<br>27 | 1.02(0.86-1.19)        | 0.86<br>0  | 0.94(0.88-1.01)        | 0.110<br>0 | 1.10(1.00-1.20) | 0.046<br>5 | 1.09(1.01-1.18) | 0.02<br>29 | 1.15(0.95-1.40) | 0.150<br>0 |
|                                           | Rural              | 1.00(0.81-1.22)        | 0.98<br>41 | 1.09(0.80-1.45)        | 0.58<br>13 | 0.78(0.65-0.93)        | 0.00<br>73 | 1.15(0.95-1.38) | 0.134<br>8 | 1.15(0.97-1.36) | 0.09<br>56 | 1.09(0.77-1.51) | 0.597<br>9 |
| Duration of breastfeeding $\geq$ 6 months | of $\geq$ 6 months | ..                     | ..         | 0.85(0.75-0.97)        | 0.01<br>64 | 0.83(0.79-0.88)        | <<br>0.00  | ..              | ..         | 0.92(0.86-0.97) | 0.00<br>28 | 0.96(0.82-1.12) | 0.588<br>6 |
| Premature birth                           |                    | ..                     | ..         | ..                     | ..         | ..                     | ..         | 1.32(1.02-1.70) | 0.032<br>3 | 1.28(1.05-1.55) | 0.01<br>28 | 1.34(0.77-2.21) | 0.269<br>3 |
| Birth weight (g)                          |                    |                        |            |                        |            |                        |            |                 |            |                 |            |                 |            |
| <2500                                     |                    | 0.99(0.81-1.21)        | 0.93<br>51 | 0.85(0.60-1.17)        | 0.32<br>12 | 1.16(1.02-1.32)        | 0.02<br>85 | 1.21(0.99-1.47) | 0.055<br>1 | 1.24(1.06-1.44) | 0.00<br>72 | 0.83(0.54-1.24) | 0.389<br>0 |
| 2500~4000                                 |                    | 1.00                   |            | 1.00                   |            | 1.00                   |            | 1.00            |            | 1.00            |            | 1.00            |            |
| $\geq$ 4000                               |                    | 0.93(0.81-1.06)        | 0.28<br>17 | 0.90(0.70-1.16)        | 0.43<br>09 | 0.88(0.79-0.98)        | 0.01<br>86 | 0.87-1.04       | 0.246<br>6 | 0.98(0.90-1.05) | 0.54<br>07 | 0.92(0.76-1.12) | 0.432<br>2 |
| Parental smoking                          |                    |                        |            |                        |            |                        |            |                 |            |                 |            |                 |            |
| None                                      |                    | 1.00                   |            | 1.00                   |            | 1.00                   |            | 1.00            |            | 1.00            |            | 1.00            |            |
| One                                       |                    | 1.13(1.05-1.21)        | 0.00<br>10 | 1.31(1.15-1.49)        | <<br>0.00  | 1.09(1.03-1.15)        | 0.00<br>15 | 1.34(0.25-1.44) | <<br>0.000 | 1.27(1.19-1.35) | <<br>0.00  | 1.53(1.30-1.79) | <<br>0.000 |
| Two                                       |                    | 0.91(0.52-1.52)        | 0.73       | 0.99(0.42-2.29)        | 0.97       | 1.04(0.71-1.44)        | 0.84       | 1.28(0.74-2.17) | 0.362      | 1.30(0.82-2.00) | 0.24       | 1.92(0.71-4.94) | 0.160      |

|                                          |                 |          |                 |      |                 |          |                 |          |                 |          |                 |       |
|------------------------------------------|-----------------|----------|-----------------|------|-----------------|----------|-----------------|----------|-----------------|----------|-----------------|-------|
| Used antibiotics                         | 54)             | 43       | 03)             | 23   | 51)             | 19       | 13)             | 5        | 04)             | 99       | 50)             | 5     |
|                                          | 2.66(2.41-2.93) | < 0.0001 | ..              | ..   | ..              | ..       | 0.23(0.20-0.25) | < 0.0001 | ..              | ..       | ..              | ..    |
| History of parental asthma               | ..              | ..       | ..              | ..   | ..              | ..       | ..              | ..       | ..              | ..       | ..              | ..    |
| None                                     | ..              | ..       | ..              | ..   | ..              | ..       | 1.00            | ..       | 1.00            | ..       | 1.00            | ..    |
| One                                      | ..              | ..       | ..              | ..   | ..              | ..       | 1.24(0.98-1.55) | 0.067    | 1.20(1.00-1.45) | 0.04     | 1.38(0.81-2.24) | 0.214 |
| Two                                      | ..              | ..       | ..              | ..   | ..              | ..       | 1.20(0.66-2.13) | 0.542    | 1.00(0.60-1.61) | 0.98     | 0.76(0.04-4.26) | 0.755 |
| History of parental allergy              | ..              | ..       | ..              | ..   | ..              | ..       | ..              | ..       | ..              | ..       | ..              | ..    |
| None                                     | 1.00            | ..       | 1.00            | ..   | 1.00            | ..       | 1.00            | ..       | 1.00            | ..       | 1.00            | ..    |
| One                                      | 1.15(1.02-1.31) | 0.02     | 1.37(1.05-1.79) | 0.01 | 1.19(1.09-1.30) | < 0.0001 | 1.20(1.11-1.30) | < 0.0001 | 1.20(1.13-1.28) | < 0.0001 | 1.12(0.92-1.35) | 0.255 |
| Two                                      | 1.84(1.28-2.66) | 0.00     | 2.37(1.22-4.53) | 0.00 | 1.20(0.93-1.55) | 0.16     | 1.17(1.00-1.36) | 0.045    | 1.17(1.03-1.33) | 0.01     | 1.83(1.26-2.61) | 0.001 |
| Frequency of putting bedding to sunshine | ..              | ..       | ..              | ..   | ..              | ..       | ..              | ..       | ..              | ..       | ..              | ..    |
| Never                                    | 1.00            | ..       | 1.00            | ..   | 1.00            | ..       | ..              | ..       | ..              | ..       | ..              | ..    |
| Sometimes                                | 0.98(0.80-1.21) | 0.87     | 0.82(0.59-1.14) | 0.22 | 0.94(0.80-1.10) | 0.44     | ..              | ..       | ..              | ..       | ..              | ..    |
| Often                                    | 0.87(0.71-1.08) | 0.20     | 0.67(0.49-0.93) | 0.01 | 0.85(0.73-0.99) | 0.04     | ..              | ..       | ..              | ..       | ..              | ..    |

Cooking fuel type

|                          |                 |         |                 |        |                 |         |                 |         |                 |        |                 |         |
|--------------------------|-----------------|---------|-----------------|--------|-----------------|---------|-----------------|---------|-----------------|--------|-----------------|---------|
| Natural gas/coal gas     | 1.00            |         | 1.00            |        | 1.00            |         | 1.00            |         | 1.00            |        | 1.00            |         |
| Coal                     | 0.93(0.79-1.10) | 0.4231  | 0.86(0.66-1.12) | 0.2851 | 1.03(0.92-1.16) | 0.5774  | 1.83(1.01-3.21) | 0.0398  | 1.33(0.80-2.18) | 0.2546 | 2.52(1.07-5.35) | 0.0233  |
| Electricity              | 0.83(0.74-0.93) | 0.0019  | 0.92(0.76-1.11) | 0.3750 | 0.86(0.78-0.93) | 0.0005  | 1.03(0.88-1.22) | 0.6864  | 0.98(0.85-1.13) | 0.7667 | 0.83(0.58-1.15) | 0.8295  |
| Wood                     | 0.67(0.39-1.09) | 0.1182  | 0.80(0.36-1.59) | 0.5463 | 0.82(0.55-1.21) | 0.3252  | --              | 0.9035* | 0.69(0.12-3.27) | 0.6547 | --              | 0.9577* |
| Other                    | 1.05(0.89-1.24) | 0.5473  | 0.97(0.70-1.31) | 0.8422 | 1.15(1.01-1.31) | 0.0331  | 0.33(0.14-0.66) | 0.0036  | 0.45(0.25-0.76) | 0.0050 | 0.28(0.07-0.75) | 0.0311  |
| Indoor dampness          | 1.24(1.12-1.38) | <0.0001 | 1.34(1.10-1.63) | 0.0028 | 1.22(1.13-1.32) | <0.0001 | 1.20(1.09-1.31) | 0.0001  | 1.16(1.07-1.25) | 0.0002 | 1.13(0.90-1.41) | 0.2880  |
| Home interior decoration | 1.02(0.93-1.12) | 0.6747  | 1.15(0.96-1.38) | 0.1234 | 1.11(1.03-1.19) | 0.0042  | ..              | ..      | ..              | ..     | ..              | ..      |
| Wall painting materials  |                 |         |                 |        |                 |         | ..              | ..      | ..              | ..     | ..              | ..      |
| Wall paper               |                 |         | 1.00            |        | 1.00            |         | ..              | ..      | ..              | ..     | ..              | ..      |
| Emulsion paint           | 1.09(0.96-1.25) | 0.1764  | 1.09(0.88-1.37) | 0.4229 | 1.06(0.96-1.16) | 0.2399  | ..              | ..      | ..              | ..     | ..              | ..      |
| Paint                    | 1.16(0.98-1.25) | 0.0910  | 0.99(0.74-1.31) | 0.9283 | 1.19(1.06-1.34) | 0.0043  | ..              | ..      | ..              | ..     | ..              | ..      |
| Wood                     | 0.92(0.62-1.34) | 0.6784  | 0.54(0.28-0.97) | 0.0529 | 0.95(0.69-1.29) | 0.7296  | ..              | ..      | ..              | ..     | ..              | ..      |
| Lime / cement            | 0.98(0.84-1.15) | 0.8031  | 1.04(0.80-1.35) | 0.7621 | 0.98(0.87-1.10) | 0.6849  | ..              | ..      | ..              | ..     | ..              | ..      |
| Other                    | 0.99(0.81-1.15) | 0.93    | 0.85(0.61-1.15) | 0.33   | 0.97(0.83-1.15) | 0.65    | ..              | ..      | ..              | ..     | ..              | ..      |

|                                     |                 |        |                 |       |                 |        |                 |       |                 |      |                 |       |    |
|-------------------------------------|-----------------|--------|-----------------|-------|-----------------|--------|-----------------|-------|-----------------|------|-----------------|-------|----|
|                                     | 21)             | 20     | 18)             | 51    | 13)             | 70     |                 |       |                 |      |                 |       |    |
| Flooring materials                  |                 |        |                 |       |                 |        | ..              | ..    | ..              | ..   | ..              | ..    | .. |
| Solid wood / multi-layer solid wood | 1.00            |        | 1.00            |       | 1.00            |        | ..              | ..    | ..              | ..   | ..              | ..    | .. |
| Laminate / Composite wood           | 1.07(0.97-1.18) | 0.16   | 1.15(0.97-1.38) | 0.112 | 1.07(1.00-1.15) | 0.04   | ..              | ..    | ..              | ..   | ..              | ..    | .. |
| Bamboo                              | 0.86(0.63-1.15) | 0.32   | 0.96(0.53-1.63) | 0.88  | 0.79(0.62-0.99) | 0.04   | ..              | ..    | ..              | ..   | ..              | ..    | .. |
| Ceramic tile / stone / cement       | 0.96(0.87-1.05) | 0.38   | 0.96(0.81-1.14) | 0.65  | 1.01(0.94-1.09) | 0.72   | ..              | ..    | ..              | ..   | ..              | ..    | .. |
| PVC / plastics / plastic leather    | 0.83(0.59-1.14) | 0.25   | 1.31(0.76-2.16) | 0.30  | 0.90(0.70-1.16) | 0.42   | ..              | ..    | ..              | ..   | ..              | ..    | .. |
| Other                               | 1.17(0.88-1.54) | 0.26   | 0.90(0.57-1.37) | 0.62  | 1.15(0.91-1.44) | 0.23   | ..              | ..    | ..              | ..   | ..              | ..    | .. |
| Indoor heating mode                 |                 |        |                 |       |                 |        | ..              | ..    | ..              | ..   | ..              | ..    | .. |
| No heating                          | 1.00            |        | 1.00            |       | 1.00            |        | ..              | ..    | ..              | ..   | ..              | ..    | .. |
| Individual household heating        | 1.05(0.93-1.17) | 0.43   | 1.02(0.84-1.25) | 0.82  | 1.04(0.96-1.14) | 0.33   | ..              | ..    | ..              | ..   | ..              | ..    | .. |
| Central heating                     | 1.18(1.04-1.35) | 0.01   | 1.06(0.84-1.35) | 0.61  | 1.20(1.08-1.33) | 0.00   | ..              | ..    | ..              | ..   | ..              | ..    | .. |
| Other                               | 0.83(0.61-1.11) | 0.21   | 0.92(0.57-1.43) | 0.71  | 1.08(0.86-1.36) | 0.51   | ..              | ..    | ..              | ..   | ..              | ..    | .. |
| Indoor air-conditioning             | 0.82(0.76-0.90) | < 0.00 | 0.84(0.72-0.98) | 0.02  | 0.85(0.79-0.91) | < 0.00 | 0.87(0.80-0.95) | 0.001 | 0.88(0.82-0.95) | 0.00 | 0.95(0.80-1.13) | 0.548 | 4  |
| Asthma                              | 2.66(2.30-3.01) | <      | 3.89(2.98-5.01) | <     | 2.24(2.03-2.45) | <      | 2.05(1.71-2.39) | <     | 1.72(1.50-1.94) | <    | 4.47(2.90-6.84) | <     |    |

|                   |                 |      |                 |      |                 |      |                 |       |                 |      |                 |       |
|-------------------|-----------------|------|-----------------|------|-----------------|------|-----------------|-------|-----------------|------|-----------------|-------|
|                   | 07)             | 0.00 | 09)             | 0.00 | 47)             | 0.00 | 46)             | 0.000 | 98)             | 0.00 | 84)             | 0.000 |
|                   |                 | 01   |                 | 01   |                 | 01   |                 | 1     |                 | 01   |                 | 1     |
| Allergic rhinitis | 1.41(1.24-1.60) | <    | 1.30(1.00-1.68) | 0.04 | 1.37(1.25-1.49) | <    | 1.54(0.39-1.71) | <     | 1.56(1.44-1.69) | <    | 1.56(1.17-2.05) | 0.001 |
|                   |                 | 01   |                 | 82   |                 | 01   |                 | 1     |                 | 01   |                 | 8     |
| Wheezing          | 1.69(1.55-1.83) | <    | 1.90(1.62-2.22) | <    | 1.61(1.51-1.71) | <    | 2.40(2.10-2.75) | <     | 2.41(2.17-2.67) | <    | 2.75(1.91-3.89) | <     |
|                   |                 | 01   |                 | 01   |                 | 01   |                 | 1     |                 | 01   |                 | 1     |

After a multivariate logistic stepwise regression analysis, the co-variables that were finally included in the analysis are listed in the table. ORs of 1.00 indicate reference values. Pneumonia, asthma, allergic rhinitis were defined as physician-diagnosed since birth of children. Wheezing was defined as parents reported that the child has great difficulty breathing or the respiratory muscles of the child are all involved in breathing, and the respiratory rate of the child is faster than normal since birth. Premature birth was defined as delivery under 37 weeks of pregnancy. Used antibiotics was defined as child has been injected or taken since birth, such as but not limited to penicillin, azithromycin, cephalosporin, etc. Parental smoking was defined as parents smoked equal to or more than 100 cigarettes in the lifetime. OR=odds ratio. \*p value were OR <0.0001 maybe due to too few subjects for these co-variables.

**Table S3: Multiple adjusted odds ratios of asthma, allergic rhinitis and wheezing and in the Chinese seven cities of preschool children in 2011 and 2019**

|       | 2011            |         |                   |         |                 |         | 2019            |         |                   |         |                 |         |
|-------|-----------------|---------|-------------------|---------|-----------------|---------|-----------------|---------|-------------------|---------|-----------------|---------|
|       | Asthma          |         | Allergic rhinitis |         | Wheezing        |         | Asthma          |         | Allergic rhinitis |         | Wheezing        |         |
|       | OR(95%CI)       | p value | OR(95%CI)         | p value | OR(95%CI)       | p value | OR(95%CI)       | p value | OR(95%CI)         | p value | OR(95%CI)       | p value |
| Girls | 0.74(0.67-0.81) | <0.001  | 0.75(0.69-0.81)   | <0.001  | 0.86(0.81-0.91) | <0.001  | 0.81(0.71-0.93) | 0.002   | 0.81(0.75-0.87)   | <0.001  | 0.72(0.65-0.80) | <0.001  |
| Age   |                 |         |                   |         |                 |         |                 |         |                   |         |                 |         |
| 2-4   | ..              | ..      | 1.00              |         | 1.00            |         | ..              | ..      | ..                | ..      | ..              | ..      |
| 4-6   | ..              | ..      | 1.60(1.39-1.84)   | <0.001  | 1.14(1.04-1.25) | 0.002   | ..              | ..      | ..                | ..      | ..              | ..      |

|                  |           |            |      |            |      |            |      |              |      |            |      |              |      |       |     |       |     |       |     |       |     |       |     |     |     |      |
|------------------|-----------|------------|------|------------|------|------------|------|--------------|------|------------|------|--------------|------|-------|-----|-------|-----|-------|-----|-------|-----|-------|-----|-----|-----|------|
|                  | 6-8       | ..         | ..   | 1.86)      | 001  | 1.25)      | 47   | 2.25(1.93-   | <0.0 | 2.24(2.04- | <0.0 | ..           | ..   | ..    | ..  | ..    | ..  |       |     |       |     |       |     |     |     |      |
|                  |           |            |      | 2.64)      | 001  | 2.47)      | 001  |              |      |            |      |              |      |       |     |       |     |       |     |       |     |       |     |     |     |      |
| Urbanisation     |           |            |      |            |      |            |      |              |      |            |      |              |      |       |     |       |     |       |     |       |     |       |     |     |     |      |
|                  | Urban     | 1.00       |      | 1.00       |      | 1.00       |      | 1.00         |      | 1.00       |      | 1.00         |      | 1.00  |     | ..    | ..  |       |     |       |     |       |     |     |     |      |
|                  | Suburb    | 0.85(0.75- | 0.00 | 0.84(0.76- | 0.00 | 1.14(1.07- | 0.00 | 1.34(1.13-1. | 0.00 | 0.82(0.73- | 0.00 | 0.95)        | 56   | 0.93) | 13  | 1.22) | 01  | 58)   | 07  | 0.91) | 02  | ..    | ..  |     |     |      |
|                  | Rural     | 0.63(0.44- | 0.00 | 0.44(0.29- | <0.0 | 0.90(0.76- | 0.19 | 1.16(0.78-1. | 0.44 | 0.69(0.52- | 0.00 | 0.88)        | 96   | 0.62) | 001 | 1.05) | 10  | 67)   | 43  | 0.90) | 72  | ..    | ..  |     |     |      |
| Duration         | of        | 0.84(0.76- | 0.00 | 0.85(0.78- | <0.0 | 1.05(1.00- | 0.07 | 0.87(0.77-1. | 0.04 | 0.80(0.75- | <0.0 | 0.81(0.73-0. | <0.0 | 0.92) | 02  | 0.92) | 001 | 1.11) | 24  | 00)   | 37  | 0.87) | 001 | 89) | 001 | <0.0 |
| breastfeeding    |           |            |      |            |      |            |      |              |      |            |      |              |      |       |     |       |     |       |     |       |     |       |     |     |     |      |
| ≥ 6 months       |           |            |      |            |      |            |      |              |      |            |      |              |      |       |     |       |     |       |     |       |     |       |     |     |     |      |
| Birth weight (g) |           |            |      |            |      |            |      |              |      |            |      |              |      |       |     |       |     |       |     |       |     |       |     |     |     |      |
|                  | <2500     | ..         | ..   | ..         | ..   | ..         | ..   | ..           | ..   | 1.00       | ..   | ..           | ..   | ..    | ..  | ..    | ..  |       |     |       |     |       |     |     |     |      |
|                  | 2500~4000 | ..         | ..   | ..         | ..   | ..         | ..   | ..           | ..   | 1.30(1.06- | 0.01 | ..           | ..   | ..    | ..  | ..    | ..  |       |     |       |     |       |     |     |     |      |
|                  |           |            |      |            |      |            |      |              |      | 1.62)      | 52   |              |      |       |     |       |     |       |     |       |     |       |     |     |     |      |
|                  | ≥4000     | ..         | ..   | ..         | ..   | ..         | ..   | ..           | ..   | 1.35(1.08- | 0.01 | ..           | ..   | ..    | ..  | ..    | ..  |       |     |       |     |       |     |     |     |      |
|                  |           |            |      |            |      |            |      |              |      | 1.70)      | 1    |              |      |       |     |       |     |       |     |       |     |       |     |     |     |      |
| Parental smoking |           |            |      |            |      |            |      |              |      |            |      |              |      |       |     |       |     |       |     |       |     |       |     |     |     |      |
|                  | None      | ..         | ..   | ..         | ..   | ..         | ..   | ..           | ..   | 1.00       | ..   | 1.00         | ..   | ..    | ..  | ..    | ..  |       |     |       |     |       |     |     |     |      |
|                  | One       | ..         | ..   | ..         | ..   | ..         | ..   | ..           | ..   | 1.10(1.01- | 0.02 | 1.16(1.04-1. | 0.00 | ..    | ..  | ..    | ..  |       |     |       |     |       |     |     |     |      |
|                  |           |            |      |            |      |            |      |              |      | 1.19)      | 84   | 29)          | 72   |       |     |       |     |       |     |       |     |       |     |     |     |      |
|                  | Two       | ..         | ..   | ..         | ..   | ..         | ..   | ..           | ..   | 0.53(0.47- | <0.0 | 1.85(0.95-3. | 0.05 | ..    | ..  | ..    | ..  |       |     |       |     |       |     |     |     |      |
|                  |           |            |      |            |      |            |      |              |      | 0.58)      | 001  | 36)          | 70   |       |     |       |     |       |     |       |     |       |     |     |     |      |
| Used antibiotics |           | 1.46(1.27- | <0.0 | 1.61(1.44- | <0.0 | 1.46(1.36- | <0.0 | 0.62(0.50-0. | <0.0 | 0.53(0.47- | <0.0 | 0.47(0.40-0. | <0.0 | 1.69) | 001 | 1.82) | 001 | 1.57) | 001 | 77)   | 001 | 0.58) | 001 | 55) | 001 | <0.0 |

History of parental asthma

|      |                  |        |                 |        |                 |        |                 |        |                 |        |                 |        |      |
|------|------------------|--------|-----------------|--------|-----------------|--------|-----------------|--------|-----------------|--------|-----------------|--------|------|
| None | 1.00             |        | 1.00            |        | 1.00            |        | 1.00            |        | 1.00            |        | 1.00            |        | 1.00 |
| One  | 2.67(2.23-3.18)  | <0.001 | 1.34(1.11-1.59) | 0.0016 | 2.00(1.72-2.32) | <0.001 | 2.95(2.29-3.80) | <0.001 | 0.96(0.78-1.18) | 0.7060 | 2.71(2.16-3.38) | <0.001 |      |
| Two  | 5.81(2.11-15.58) | 0.0005 | 1.53(0.47-4.19) | 0.4391 | 3.23(1.21-9.20) | 0.022  | 1.48(0.42-3.92) | 0.4812 | 0.20(0.08-0.41) | <0.001 | 0.44(0.12-1.16) | 0.1427 |      |

History of parental allergy

|      |                 |        |                 |        |                 |        |                 |        |                 |        |                 |        |      |
|------|-----------------|--------|-----------------|--------|-----------------|--------|-----------------|--------|-----------------|--------|-----------------|--------|------|
| None | 1.00            |        | 1.00            |        | 1.00            |        | 1.00            |        | 1.00            |        | 1.00            |        | 1.00 |
| One  | 1.32(1.17-1.50) | <0.001 | 4.11(3.73-4.52) | <0.001 | 1.41(1.29-1.55) | <0.001 | 1.23(1.07-1.42) | 0.0040 | 3.00(2.78-3.24) | <0.001 | 1.48(1.33-1.65) | <0.001 |      |
| Two  | 1.22(0.87-1.69) | 0.2503 | 7.04(5.49-9.00) | <0.001 | 1.85(1.44-2.39) | <0.001 | 1.30(1.00-1.67) | 0.044  | 5.56(4.89-6.32) | <0.001 | 1.62(1.33-1.96) | <0.001 |      |

|                                        |    |    |                 |        |                 |        |    |    |    |    |    |    |    |
|----------------------------------------|----|----|-----------------|--------|-----------------|--------|----|----|----|----|----|----|----|
| Residence area $\geq$ 75m <sup>2</sup> | .. | .. | 1.16(1.06-1.26) | 0.0010 | 1.10(1.04-1.16) | 0.0013 | .. | .. | .. | .. | .. | .. | .. |
|----------------------------------------|----|----|-----------------|--------|-----------------|--------|----|----|----|----|----|----|----|

Frequency of clean children's rooms

|           |    |    |    |    |                 |        |    |    |    |    |                 |        |    |
|-----------|----|----|----|----|-----------------|--------|----|----|----|----|-----------------|--------|----|
| Rarely    | .. | .. | .. | .. | 1.00            | ..     | .. | .. | .. | .. | 1.00            | ..     | .. |
| Sometimes | .. | .. | .. | .. | 0.92(0.73-1.17) | 0.5054 | .. | .. | .. | .. | 0.78(0.60-1.03) | 0.0725 |    |
| Often     | .. | .. | .. | .. | 0.79(0.63-0.99) | 0.0401 | .. | .. | .. | .. | 0.67(0.52-0.87) | 0.0020 |    |

|                 |    |    |                 |        |                 |        |    |    |                 |        |                 |        |  |
|-----------------|----|----|-----------------|--------|-----------------|--------|----|----|-----------------|--------|-----------------|--------|--|
| Indoor dampness | .. | .. | 1.20(1.07-1.33) | 0.0011 | 1.32(1.22-1.43) | <0.001 | .. | .. | 1.12(1.02-1.24) | 0.0159 | 1.42(1.26-1.60) | <0.001 |  |
|-----------------|----|----|-----------------|--------|-----------------|--------|----|----|-----------------|--------|-----------------|--------|--|

|               |    |    |    |    |               |        |    |    |    |    |    |    |    |
|---------------|----|----|----|----|---------------|--------|----|----|----|----|----|----|----|
| Home interior | .. | .. | .. | .. | 1.11(1.05-..) | 0.00.. | .. | .. | .. | .. | .. | .. | .. |
|---------------|----|----|----|----|---------------|--------|----|----|----|----|----|----|----|

|                                     |                 |        |                 |         |       |    |                 |        |                 |         |                 |         |  |
|-------------------------------------|-----------------|--------|-----------------|---------|-------|----|-----------------|--------|-----------------|---------|-----------------|---------|--|
| purchase new furniture              |                 |        |                 |         | 1.18) | 03 |                 |        |                 |         |                 |         |  |
| Wall painting materials             |                 |        |                 |         |       |    |                 |        |                 |         |                 |         |  |
| Wall paper                          | ..              | ..     | 1.00            |         | ..    | .. | ..              | ..     | 1.00            |         | ..              | ..      |  |
| Emulsion paint                      | ..              | ..     | 1.05(0.92-1.20) | 0.5004  | ..    | .. | ..              | ..     | 1.01(0.93-1.11) | 0.7692  | ..              | ..      |  |
| Paint                               | ..              | ..     | 1.09(0.92-1.29) | 0.3078  | ..    | .. | ..              | ..     | 0.74(0.56-0.96) | 0.0285  | ..              | ..      |  |
| Wood                                | ..              | ..     | 0.84(0.52-1.30) | 0.4528  | ..    | .. | ..              | ..     | 0.96(0.55-1.59) | 0.8925  | ..              | ..      |  |
| Lime / cement                       | ..              | ..     | 0.81(0.67-0.97) | 0.0242  | ..    | .. | ..              | ..     | 0.98(0.72-1.29) | 0.8641  | ..              | ..      |  |
| Other                               | ..              | ..     | 0.82(0.64-1.04) | 0.1048  | ..    | .. | ..              | ..     | 0.83(0.75-0.92) | 0.0006  | ..              | ..      |  |
| Flooring materials                  |                 |        |                 |         |       |    |                 |        |                 |         |                 |         |  |
| Solid wood / multi-layer solid wood | 1.00            |        | 1.00            |         | ..    | .. | 1.00            |        | 1.00            |         | 1.00            |         |  |
| Laminate / Composite wood           | 0.91(0.81-1.01) | 0.0852 | 1.04(0.95-1.15) | 0.4142  | ..    | .. | 0.87(0.75-1.01) | 0.0706 | 1.14(1.05-1.24) | 0.0017  | 1.06(0.95-1.19) | 0.2862  |  |
| Bamboo                              | 1.09(0.73-1.60) | 0.6626 | 1.12(0.80-1.54) | 0.4885  | ..    | .. | 1.08(0.50-2.11) | 0.8249 | 1.05(0.67-1.57) | 0.8342  | 1.10(0.62-1.84) | 0.7280  |  |
| Ceramic tile / stone / cement       | 0.77(0.67-0.88) | 0.0001 | 0.74(0.65-0.84) | <0.0001 | ..    | .. | 0.96(0.79-1.15) | 0.6491 | 0.79(0.71-0.88) | <0.0001 | 0.75(0.65-0.87) | <0.0001 |  |
| PVC / plastics /                    | 0.83(0.53-      | 0.41   | 0.61(0.38-      | 0.02    | ..    | .. | 0.18(0.01-0.    | 0.10   | 1.36(0.70-      | 0.33    | 1.30(0.52-2.    | 0.53    |  |



|                   |                      |                 |         |                 |         |                 |         |                    |         |                 |         |                    |         |
|-------------------|----------------------|-----------------|---------|-----------------|---------|-----------------|---------|--------------------|---------|-----------------|---------|--------------------|---------|
|                   | plastic leather      | 1.27)           | 79      | 0.92)           | 55      |                 |         | 94)                | 49      | 2.48)           | 41      | 74)                | 18      |
|                   | Other                | 0.98(0.67-1.40) | 0.9019  | 0.72(0.49-1.03) | 0.0801  | ..              | ..      | 0.88(0.50-1.47)    | 0.6530  | 0.80(0.56-1.10) | 0.1802  | 1.03(0.68-1.52)    | 0.8747  |
| Indoor            | heating mode         |                 |         |                 |         |                 |         |                    |         |                 |         |                    |         |
|                   | No heating           | 1.00            |         | ..              | ..      | ..              | ..      | 1.00               |         | 1.00            |         | 1.00               |         |
| Individual        | household heating    | 0.88(0.77-1.01) | 0.0755  | ..              | ..      | ..              | ..      | 0.88(0.76-1.02)    | 0.0849  | 1.05(0.96-1.14) | 0.2858  | 0.97(0.87-1.09)    | 0.6117  |
|                   | Central heating      | 0.48(0.39-0.57) | <0.0001 | ..              | ..      | ..              | ..      | 0.53(0.42-0.67)    | <0.0001 | 0.65(0.57-0.74) | <0.0001 | 0.74(0.62-0.87)    | 0.0005  |
|                   | Other                | 1.19(0.83-1.69) | 0.3373  | ..              | ..      | ..              | ..      | 0.95(0.63-1.40)    | 0.8102  | 0.99(0.79-1.23) | 0.9290  | 0.50(0.35-0.71)    | 0.0002  |
| Indoor            | use air-conditioning | 1.32(1.17-1.49) | <0.0001 | ..              | ..      | ..              | ..      | ..                 | ..      | 1.26(1.11-1.42) | 0.0003  | 0.83(0.71-0.98)    | 0.0219  |
| Indoor            | use air purifier     | ..              | ..      | 1.42(1.22-1.65) | <0.0001 | 1.29(1.15-1.46) | <0.0001 | ..                 | ..      | 1.26(1.16-1.35) | <0.0001 | ..                 | ..      |
| Indoor            | keeping furry pets   | ..              | ..      | ..              | ..      | 1.13(1.04-1.23) | 0.0040  | ..                 | ..      | ..              | ..      | ..                 | ..      |
| Asthma            |                      | ..              | ..      | 2.78(2.49-3.11) | <0.0001 | 7.48(6.78-8.26) | <0.0001 | ..                 | ..      | 1.84(1.58-2.14) | <0.0001 | 17.97(15.70-20.58) | <0.0001 |
| Allergic rhinitis |                      | 2.75(2.46-3.07) | <0.0001 | ..              | ..      | 1.45(1.33-1.58) | <0.0001 | 1.84(1.58-2.14)    | <0.0001 | ..              | ..      | 1.81(1.60-2.04)    | <0.0001 |
| Wheezing          |                      | 7.34(6.66-8.10) | <0.0001 | 1.48(1.36-1.62) | <0.0001 | ..              | ..      | 17.98(15.71-20.60) | <0.0001 | 1.80(1.59-2.02) | <0.0001 | ..                 | ..      |
| Pneumonia         |                      | 2.53(2.31-2.78) | <0.0001 | 1.41(1.29-1.53) | <0.0001 | 1.64(1.55-1.74) | <0.0001 | 1.96(1.72-2.25)    | <0.0001 | 1.60(1.48-1.73) | <0.0001 | 2.49(2.25-2.75)    | <0.0001 |

After a multivariate logistic stepwise regression analysis, the co-variables that were finally included in the analysis are listed in the table. ORs of 1.00 indicate reference values. Pneumonia, asthma, allergic rhinitis were defined as physician-diagnosed since birth of children. Wheezing was defined as parents reported that the child has great difficulty breathing or the respiratory muscles of the child are all involved in breathing, and the respiratory rate of the child is faster than normal since birth. Premature birth was defined as delivery under 37 weeks of pregnancy. Used antibiotics was defined as child has been injected or taken since birth, such as but not limited to penicillin, azithromycin, cephalosporin, etc. Parental smoking was defined as parents smoked equal to or more than 100 cigarettes in the lifetime. OR=odds ratio. \*p value were OR <0.0001 maybe due to too few subjects for these co-variables.

**Table S4: Age-specific and age-adjusted prevalence of pneumonia among preschool children in the Chinese seven cities in 2011 and 2019 by duration of breastfeeding**

|                        | 2011                                       |                                            |                  | 2019                                       |                                            |                  |                  |
|------------------------|--------------------------------------------|--------------------------------------------|------------------|--------------------------------------------|--------------------------------------------|------------------|------------------|
|                        | Duration of<br>breastfeeding <<br>6 months | Duration of<br>breastfeeding ≥<br>6 months | Total            | Duration of<br>breastfeeding <<br>6 months | Duration of<br>breastfeeding ≥<br>6 months | Total            |                  |
| Age (years)            |                                            |                                            |                  |                                            |                                            |                  |                  |
|                        | 2-4                                        | 34.3%(32.2-36.4)                           | 29.5%(27.6-31.4) | 31.7%(30.3-33.2)                           | 28.9%(27.2-30.6)                           | 26.6%(25.3-27.9) | 27.5%(26.4-28.5) |
|                        | 4-6                                        | 36.5%(35.6-37.5)                           | 31.9%(30.9-32.8) | 34.3%(33.6-35.0)                           | 30.1%(29.1-31.2)                           | 26.6%(25.8-27.4) | 27.9%(27.3-28.5) |
|                        | 6-8                                        | 35.4%(33.9-37.0)                           | 28.8%(27.4-30.2) | 32.0%(31.0-33.1)                           | 29.4%(27.5-31.4)                           | 27.1%(25.6-28.6) | 28.0%(26.8-29.2) |
| p value for difference |                                            | 0.7315                                     | 0.1533           | 0.4410                                     | 0.6289                                     | 0.6632           | 0.4490           |
| Gender                 |                                            |                                            |                  |                                            |                                            |                  |                  |
|                        | Boys                                       | 37.8%(36.7-38.8)                           | 31.5%(30.5-32.5) | 34.6%(33.8-35.3)                           | 31.3%(30.2-32.5)                           | 28.0%(27.2-28.9) | 29.3%(28.6-30.0) |
|                        | Girls                                      | 32.9%(31.8-34.0)                           | 28.5%(27.4-29.5) | 30.6%(29.9-31.4)                           | 27.4%(26.2-28.6)                           | 25.4%(24.5-26.2) | 26.1%(25.4-26.8) |
| p value for difference |                                            | <0.0001                                    | <0.0001          | <0.0001                                    | <0.0001                                    | <0.0001          | <0.0001          |
| Urbanisation           |                                            |                                            |                  |                                            |                                            |                  |                  |
|                        | Urban                                      | 36.4%(35.5-37.2)                           | 31.0%(30.1-31.8) | 33.7%(33.1-34.3)                           | 29.3%(28.4-30.2)                           | 26.5%(25.9-27.2) | 27.6%(27.1-28.2) |
|                        | Suburb                                     | 32.4%(30.8-34.1)                           | 28.9%(27.4-30.4) | 30.6%(29.4-31.7)                           | 31.4%(29.2-33.6)                           | 28.1%(26.5-29.6) | 29.2%(27.9-30.5) |

|                            |           |                  |                  |                  |                  |                  |                  |
|----------------------------|-----------|------------------|------------------|------------------|------------------|------------------|------------------|
|                            | Rural     | 26.3%(22.2-30.8) | 21.8%(18.7-25.1) | 23.6%(21.1-26.2) | 26.0%(21.8-30.5) | 25.3%(22.2-28.7) | 25.6%(23.0-28.2) |
| p value for difference     |           | <0.0001          | <0.0001          | <0.0001          | 0.0601           | 0.1387           | 0.0169           |
| Premature birth            |           |                  |                  |                  |                  |                  |                  |
|                            | Yes       | 37.7%(34.4-41.1) | 29.7%(25.5-34.0) | 32.6%(32.1-33.1) | 38.7%(33.4-44.3) | 33.8%(28.7-39.2) | 36.2%(32.5-40.0) |
|                            | No        | 35.3%(34.5-36.1) | 30.0%(29.3-30.8) | 34.9%(32.3-37.6) | 29.2%(28.4-30.1) | 26.6%(26.0-27.2) | 27.6%(27.1-28.1) |
| p value for difference     |           | 0.1741           | 0.8972           | 0.0922           | 0.0003           | 0.0045           | <0.0001          |
| Birth weight (g)           |           |                  |                  |                  |                  |                  |                  |
|                            | <2500     | 38.6%(35.2-42.0) | 29.3%(25.3-33.5) | 34.9%(32.3-37.6) | 32.4%(28.5-36.6) | 32.3%(28.5-36.3) | 32.3%(29.6-35.1) |
|                            | 2500-4000 | 35.4%(34.6-36.2) | 30.2%(29.4-31.0) | 32.8%(32.2-33.3) | 29.2%(28.3-30.1) | 27.0%(26.3-27.7) | 27.8%(27.3-28.4) |
|                            | ≥ 4000    | 33.0%(30.1-36.0) | 28.5%(25.9-31.2) | 30.3%(28.4-32.3) | 30.5%(28.4-32.6) | 24.9%(23.5-26.3) | 26.9%(25.7-28.0) |
| p value for trend          |           | 0.0154           | 0.4345           | 0.0036           | 0.9208           | 0.0002           | 0.0030           |
| Parental smoking           |           |                  |                  |                  |                  |                  |                  |
|                            | None      | 34.0%(33.0-35.0) | 29.3%(28.3-30.3) | 31.6%(30.9-32.3) | 27.7%(26.7-28.6) | 24.9%(24.2-25.6) | 25.9%(25.4-26.5) |
|                            | One       | 37.2%(36.0-38.3) | 30.9%(29.8-32.0) | 33.9%(33.1-34.7) | 33.7%(32.1-35.3) | 31.4%(30.2-32.6) | 32.3%(31.3-33.3) |
|                            | Two       | 36.1%(26.9-46.2) | 31.9%(21.4-44.0) | 34.3%(27.3-41.8) | 39.1%(25.2-54.4) | 26.4%(16.7-38.2) | 31.6%(23.4-40.8) |
| p value for trend          |           | <0.0001          | 0.0261           | <0.0001          | <0.0001          | <0.0001          | <0.0001          |
| Used antibiotics           |           |                  |                  |                  |                  |                  |                  |
|                            | Yes       | 40.5%(39.6-41.4) | 35.0%(34.1-35.9) | 37.8%(37.2-38.4) | 9.8%(8.8-10.9)   | 9.3%(8.6-10.1)   | 9.5%(8.9-10.2)   |
|                            | No        | 17.2%(15.9-18.5) | 15.0%(13.0-16.2) | 16.0%(15.2-16.9) | 36.2%(35.2-37.2) | 33.4%(32.6-34.2) | 34.4%(33.9-35.1) |
| p value for difference     |           | <0.0001          | <0.0001          | <0.0001          | <0.0001          | <0.0001          | <0.0001          |
| History of parental asthma |           |                  |                  |                  |                  |                  |                  |
|                            | None      | 35.1%(34.3-35.8) | 29.7%(29.0-30.5) | 32.3%(31.8-32.9) | 29.1%(28.3-30.0) | 26.5%(25.8-27.1) | 27.5%(27.0-28.0) |
|                            | One       | 46.0%(41.7-50.4) | 40.8%(35.9-45.9) | 43.9%(40.6-47.1) | 44.9%(39.0-59.0) | 40.2%(35.3-45.4) | 42.2%(38.4-46.0) |
|                            | Two       | 22.2%(3.3-57.9)  | 53.2%(23.5-81.3) | 49.1%(27.5-71.0) | 16.9%(5.9-34.7)  | 25.2%(14.4-38.9) | 22.3%(13.9-32.6) |
| p value for trend          |           | <0.0001          | <0.0001          | <0.0001          | 0.0001           | <0.0001          | <0.0001          |

|                                          |                        |                  |                  |                  |                  |                  |                  |
|------------------------------------------|------------------------|------------------|------------------|------------------|------------------|------------------|------------------|
| History of parental allergy              |                        |                  |                  |                  |                  |                  |                  |
|                                          | None                   | 34.0%(33.2-34.7) | 29.0%(28.2-29.7) | 31.4%(30.8-31.9) | 26.3%(25.4-27.3) | 23.9%(23.2-24.6) | 24.8%(24.2-25.3) |
|                                          | One                    | 46.8%(44.4-49.2) | 39.9%(37.3-42.6) | 43.8%(42.0-45.6) | 36.3%(34.7-38.1) | 33.3%(32.0-34.6) | 34.5%(33.5-35.6) |
|                                          | Two                    | 46.5%(38.8-54.3) | 51.9%(43.1-60.6) | 48.6%(42.9-54.4) | 39.4%(35.3-43.6) | 36.0%(32.9-39.2) | 37.3%(34.8-39.8) |
|                                          | p value for trend      | <0.0001          | <0.0001          | <0.0001          | <0.0001          | <0.0001          | <0.0001          |
| Residence area                           |                        |                  |                  |                  |                  |                  |                  |
|                                          | <75m <sup>2</sup>      | 34.8%(33.6-36.1) | 29.6%(28.4-30.7) | 32.1%(31.2-32.9) | 30.5%(28.9-32.3) | 25.2%(24.0-26.5) | 27.3%(26.3-28.3) |
|                                          | ≥75m <sup>2</sup>      | 35.8%(34.8-36.7) | 30.4%(29.4-31.3) | 33.1%(32.4-33.8) | 29.1%(28.2-30.1) | 27.2%(26.5-27.9) | 27.9%(27.4-28.5) |
|                                          | p value for difference | 0.2411           | 0.2968           | 0.0609           | 0.1534           | 0.0072           | 0.2811           |
| Frequency of putting bedding to sunshine |                        |                  |                  |                  |                  |                  |                  |
|                                          | Never                  | 39.3%(35.0-43.6) | 33.0%(28.8-37.4) | 36.2%(33.2-39.2) | 23.7%(19.7-28.2) | 26.3%(22.2-30.7) | 25.1%(22.2-28.2) |
|                                          | Sometimes              | 38.9%(37.5-43.0) | 32.7%(31.4-34.0) | 35.6%(34.7-36.6) | 31.8%(30.3-33.2) | 30.1%(29.0-31.2) | 30.7%(29.9-31.6) |
|                                          | Often                  | 33.4%(32.5-34.4) | 28.6%(27.7-29.5) | 31.0%(30.4-31.6) | 28.5%(27.5-29.6) | 25.0%(24.2-25.7) | 26.3%(25.7-26.9) |
|                                          | p value for trend      | <0.0001          | <0.0001          | <0.0001          | 0.0799           | <0.0001          | <0.0001          |
| Frequency of clean children's rooms      |                        |                  |                  |                  |                  |                  |                  |
|                                          | Rarely                 | 32.7%(26.5-39.4) | 29.7%(23.7-36.2) | 30.8%(26.5-35.4) | 30.8%(26.0-35.8) | 28.9%(24.8-33.2) | 29.8%(26.7-33.0) |
|                                          | Sometimes              | 36.3%(34.4-38.2) | 32.4%(30.5-34.3) | 34.4%(33.1-35.8) | 32.0%(30.1-33.9) | 28.9%(27.4-30.4) | 30.1%(29.0-31.3) |
|                                          | Often                  | 35.3%(34.5-36.1) | 29.6%(28.9-30.4) | 32.4%(31.8-33.0) | 28.8%(27.9-29.8) | 26.2%(25.5-26.9) | 27.2%(26.6-27.7) |
|                                          | p value for trend      | 0.6781           | 0.0280           | 0.0533           | 0.0067           | 0.0010           | <0.0001          |
| Cooking fuel type                        |                        |                  |                  |                  |                  |                  |                  |
|                                          | Natural gas/coal gas   | 35.8%(34.9-36.7) | 31.1%(30.3-31.9) | 33.4%(32.8-34.0) | 29.9%(29.1-30.8) | 26.9%(26.3-27.6) | 28.1%(27.6-28.6) |
|                                          | Coal                   | 37.4%(34.6-40.3) | 29.3%(26.1-32.6) | 33.9%(31.8-36.1) | 33.6%(20.6-48.7) | 39.7%(27.2-53.3) | 36.9%(27.8-46.8) |
|                                          | Electricity            | 30.8%(38.7-32.9) | 25.0%(23.1-26.9) | 27.6%(26.2-29.0) | 23.7%(20.3-27.4) | 23.7%(20.9-26.7) | 24.0%(21.8-26.2) |

|                                      |                        |                  |                  |                  |                  |                  |                  |
|--------------------------------------|------------------------|------------------|------------------|------------------|------------------|------------------|------------------|
|                                      | Wood                   | 29.8%(20.2-40.9) | 24.7%(16.7-34.2) | 25.8%(19.7-32.8) | 51.1%(18.1-83.4) | 0.0%(0.0-52.2)   | 29.2%(8.7-58.7)  |
|                                      | Other                  | 39.8%(36.0-43.7) | 30.9%(27.6-34.3) | 34.9%(32.4-37.5) | 12.6%(6.9-20.4)  | 9.6%(4.5-17.5)   | 11.0%(7.0-16.2)  |
|                                      | p value for difference | <0.0001          | <0.0001          | <0.0001          | <0.0001          | <0.0001          | <0.0001          |
| Indoor dampness                      |                        |                  |                  |                  |                  |                  |                  |
|                                      | Yes                    | 42.0%(39.9-44.1) | 37.0%(34.8-39.1) | 39.5%(38.0-41.0) | 36.3%(34.0-38.6) | 32.4%(30.7-34.2) | 33.9%(32.5-35.2) |
|                                      | No                     | 34.4%(33.6-35.2) | 29.0%(28.3-29.8) | 31.7%(31.1-32.2) | 28.4%(27.6-29.3) | 25.8%(25.1-26.5) | 26.8%(26.3-27.3) |
|                                      | p value for difference | <0.0001          | <0.0001          | <0.0001          | <0.0001          | <0.0001          | <0.0001          |
| Home interior decoration             |                        |                  |                  |                  |                  |                  |                  |
|                                      | Yes                    | 39.0%(37.2-40.8) | 32.7%(31.0-34.6) | 35.9%(34.6-37.2) | 27.6%(25.1-30.1) | 25.3%(23.4-27.2) | 26.2%(24.7-27.7) |
|                                      | No                     | 34.7%(33.8-35.5) | 29.5%(28.7-30.2) | 32.0%(31.4-32.6) | 29.7%(28.9-30.6) | 26.9%(26.3-27.6) | 28.0%(27.4-28.5) |
|                                      | p value for difference | <0.0001          | 0.0007           | 0.0001           | 0.1113           | 0.1143           | 0.0265           |
| Home interior purchase new furniture |                        |                  |                  |                  |                  |                  |                  |
|                                      | Yes                    | 38.2%(36.9-39.5) | 31.2%(29.9-32.4) | 31.7%(31.0-32.3) | 28.7%(27.0-30.5) | 26.4%(25.1-27.7) | 27.3%(26.2-28.4) |
|                                      | No                     | 34.0%(33.1-34.9) | 29.4%(28.5-30.3) | 34.6%(33.7-35.5) | 29.7%(28.7-30.6) | 26.8%(26.1-27.5) | 27.9%(27.3-28.4) |
|                                      | p value for difference | <0.0001          | 0.0227           | <0.0001          | 0.3672           | 0.6198           | 0.3308           |
| Wall painting materials              |                        |                  |                  |                  |                  |                  |                  |
|                                      | Wall paper             | 34.7%(32.4-37.1) | 29.5%(27.1-32.0) | 32.3%(30.6-34.0) | 28.0%(26.4-29.7) | 26.8%(25.6-28.1) | 27.3%(26.3-28.3) |
|                                      | Emulsion paint         | 36.3%(35.3-37.3) | 31.4%(30.4-32.4) | 33.8%(33.1-34.5) | 32.0%(30.7-33.3) | 27.3%(26.4-28.3) | 29.1%(28.3-29.9) |
|                                      | Paint                  | 38.5%(36.3-40.7) | 31.9%(29.5-34.4) | 35.6%(34.0-37.2) | 31.9%(26.5-37.6) | 25.1%(21.3-29.2) | 27.7%(24.6-31.0) |
|                                      | Wood                   | 20.8%(14.7-28.0) | 24.2%(18.1-31.2) | 23.0%(18.6-27.9) | 14.1%(7.5-23.3)  | 14.6%(8.8-22.3)  | 14.5%(10.0-20.1) |
|                                      | Lime / cement          | 31.7%(29.6-33.8) | 26.3%(24.7-28.0) | 28.6%(27.3-29.9) | 26.4%(21.0-32.5) | 23.4%(19.6-27.5) | 24.4%(21.3-27.7) |
|                                      | Other                  | 30.8%(27.5-34.3) | 27.3%(24.5-30.3) | 28.9%(26.7-31.1) | 27.6%(26.2-29.1) | 26.5%(25.4-27.7) | 27.0%(26.1-27.9) |
|                                      | p value for difference | <0.0001          | <0.0001          | <0.0001          | <0.0001          | 0.0177           | <0.0001          |
| Flooring materials                   |                        |                  |                  |                  |                  |                  |                  |

|                                        |                  |                  |                  |                  |                  |                  |
|----------------------------------------|------------------|------------------|------------------|------------------|------------------|------------------|
| Solid wood /<br>multi-layer solid wood | 34.4%(33.4-35.4) | 29.4%(28.3-30.5) | 32.1%(31.4-32.9) | 29.4%(28.1-30.7) | 25.7%(24.7-26.7) | 27.2%(26.4-27.9) |
| Laminate / Composite wood              | 39.5%(37.9-41.1) | 34.5%(32.9-36.1) | 37.0%(35.9-38.1) | 31.2%(29.8-32.7) | 28.9%(27.8-30.1) | 29.8%(28.9-30.7) |
| Bamboo                                 | 28.9%(22.9-35.6) | 30.8%(25.0-37.1) | 30.0%(25.8-34.5) | 21.8%(14.4-30.9) | 25.1%(18.9-32.2) | 23.9%(19.0-29.3) |
| Ceramic tile / stone / cement          | 33.7%(32.1-35.4) | 28.2%(27.0-29.5) | 30.4%(29.4-31.4) | 28.8%(27.1-30.5) | 25.9%(24.8-27.1) | 26.9%(25.9-27.8) |
| PVC / plastics / plastic<br>leather    | 35.1%(28.2-42.4) | 24.1%(18.4-30.6) | 28.9%(24.5-33.7) | 21.7%(10.2-37.5) | 29.6%(18.7-42.6) | 27.9%(19.4-37.6) |
| Other                                  | 32.7%(26.9-38.9) | 29.2%(23.9-34.9) | 30.9%(26.9-35.0) | 20.2%(15.3-25.8) | 22.5%(18.1-27.4) | 21.7%(18.3-25.3) |
| p value for difference                 | <0.0001          | <0.0001          | <0.0001          | 0.0011           | 0.0002           | <0.0001          |
| Indoor heating mode                    |                  |                  |                  |                  |                  |                  |
| No heating                             | 33.6%(31.5-35.8) | 28.6%(26.7-30.6) | 31.0%(29.5-32.4) | 29.6%(28.1-31.1) | 26.1%(24.9-27.2) | 27.5%(26.6-28.4) |
| Individual household heating           | 35.0%(34.1-35.9) | 29.6%(28.6-30.5) | 32.4%(31.8-33.1) | 30.2%(29.0-31.4) | 27.6%(26.7-28.6) | 28.7%(27.9-29.4) |
| Central heating                        | 38.7%(36.9-40.5) | 33.6%(32.1-35.2) | 35.7%(34.5-36.9) | 27.7%(25.9-29.6) | 26.2%(24.9-27.5) | 26.7%(25.6-27.7) |
| Other                                  | 37.7%(31.6-44.1) | 22.5%(17.9-27.7) | 29.1%(25.3-33.1) | 28.7%(24.3-33.4) | 24.2%(21.2-27.3) | 25.7%(23.2-28.3) |
| p value for difference                 | 0.0007           | <0.0001          | <0.0001          | 0.1608           | 0.0384           | 0.0052           |
| Indoor use air-conditioning            |                  |                  |                  |                  |                  |                  |
| Yes                                    | 34.8%(33.9-35.6) | 29.4%(28.5-30.3) | 33.4%(32.5-34.3) | 30.0%(29.1-31.0) | 26.8%(26.1-27.5) | 28.1%(27.5-28.6) |
| No                                     | 36.6%(35.1-38.0) | 31.0%(29.8-32.2) | 32.2%(31.6-32.8) | 27.1%(25.2-29.0) | 26.4%(25.0-27.7) | 26.6%(25.5-27.7) |
| p value for difference                 | 0.0347           | 0.0324           | 0.0327           | 0.0065           | 0.5690           | 0.0193           |
| Indoor use air purifier                |                  |                  |                  |                  |                  |                  |
| Yes                                    | 36.2%(33.1-39.3) | 33.0%(29.4-36.6) | 34.7%(32.4-37.1) | 30.2%(28.9-31.6) | 27.1%(26.1-28.2) | 28.3%(27.5-29.1) |
| No                                     | 35.4%(34.6-36.2) | 29.9%(29.2-30.7) | 32.6%(32.0-33.1) | 29.1%(28.1-30.1) | 26.6%(25.8-27.4) | 27.6%(26.9-28.2) |
| p value for difference                 | 0.6361           | 0.0969           | 0.0780           | 0.1957           | 0.4028           | 0.1681           |
| Indoor keeping furry pets              |                  |                  |                  |                  |                  |                  |
| Yes                                    | 35.5%(33.2-37.8) | 29.0%(27.0-31.1) | 32.1%(30.6-33.7) | 31.2%(28.8-33.7) | 28.4%(26.6-30.3) | 29.4%(28.0-30.9) |

|                                             |     |                  |                  |                  |                  |                  |                  |
|---------------------------------------------|-----|------------------|------------------|------------------|------------------|------------------|------------------|
| p value for difference<br>Asthma            | No  | 35.5%(33.2-37.8) | 30.2%(29.4-31.0) | 32.8%(32.3-33.4) | 29.3%(28.4-30.1) | 26.5%(25.9-27.2) | 27.6%(27.1-28.1) |
|                                             |     | 0.9918           | 0.3070           | 0.4220           | 0.1485           | 0.0607           | 0.0179           |
| p value for difference<br>Allergic rhinitis | Yes | 62.6%(60.1-65.1) | 61.6%(58.5-64.6) | 62.2%(60.3-64.1) | 59.0%(54.8-63.1) | 59.8%(56.0-63.6) | 59.5%(56.6-62.2) |
|                                             | No  | 32.8%(32.0-33.6) | 28.0%(27.2-28.7) | 30.3%(29.8-30.8) | 28.0%(27.2-28.9) | 25.6%(25.0-26.2) | 26.5%(26.0-27.0) |
|                                             |     | <0.0001          | <0.0001          | <0.0001          | <0.0001          | <0.0001          | <0.0001          |
| p value for difference<br>Wheezing          | Yes | 48.9%(46.5-51.2) | 46.0%(43.2-48.7) | 47.6%(45.9-49.4) | 46.1%(43.7-48.6) | 42.4%(40.3-44.6) | 44.1%(42.5-45.7) |
|                                             | No  | 33.7%(32.9-34.5) | 28.7%(27.9-29.4) | 31.1%(30.6-31.6) | 26.9%(26.1-27.8) | 24.9%(24.3-25.6) | 25.6%(25.1-26.2) |
|                                             |     | <0.0001          | <0.0001          | <0.0001          | <0.0001          | <0.0001          | <0.0001          |
| p value for difference                      | Yes | 50.0%(48.5-51.6) | 44.4%(42.8-45.9) | 47.1%(46.0-48.2) | 58.3%(55.2-61.3) | 58.3%(55.2-61.3) | 57.3%(55.2-59.4) |
|                                             | No  | 30.7%(29.8-31.5) | 26.2%(25.4-27.0) | 28.4%(27.8-29.0) | 26.8%(26.0-27.6) | 26.8%(26.0-27.6) | 25.6%(25.1-26.1) |
|                                             |     | <0.0001          | <0.0001          | <0.0001          | <0.0001          | <0.0001          | <0.0001          |

Values are % (95% CI). p value for difference refers to the comparison of binary variables. Pneumonia, asthma, allergic rhinitis were defined as physician-diagnosed since birth of children. Wheezing was defined as parents reported that the child has great difficulty breathing or the respiratory muscles of the child are all involved in breathing, and the respiratory rate of the child is faster than normal since birth. Premature birth was defined as delivery under 37 weeks of pregnancy. Used antibiotics was defined as child has been injected or taken since birth, such as but not limited to penicillin, azithromycin, cephalosporin, etc. Parental smoking was defined as parents smoked equal to or more than 100 cigarettes in the lifetime. All calculations of p values are weighted, accounting for the number of people sampled in two surveys in 2011 and 2019 and based on the  $\chi^2$  test.

**Table S5: Age-specific and age-adjusted prevalence of pneumonia among preschool children in the Chinese seven cities in 2011 and 2019 by antibiotics use**

|  | 2011       |                  |       | 2019       |                  |       |
|--|------------|------------------|-------|------------|------------------|-------|
|  | Never used | Used antibiotics | Total | Never used | Used antibiotics | Total |

|                           |            | antibiotics      |                  |                  | antibiotics      |                 |                  |
|---------------------------|------------|------------------|------------------|------------------|------------------|-----------------|------------------|
| Age (years)               |            |                  |                  |                  |                  |                 |                  |
|                           | 2-4        | 15.2%(12.9-17.7) | 36.4%(34.7-38.1) | 31.7%(30.3-33.2) | 33.7%(32.5-35.0) | 10.2%(9.0-11.6) | 27.5%(26.4-28.5) |
|                           | 4-6        | 17.3%(16.2-18.4) | 39.5%(38.7-40.3) | 34.3%(33.6-35.0) | 34.7%(33.9-35.5) | 9.0%(8.2-9.8)   | 27.9%(27.3-28.5) |
|                           | 6-8        | 15.6%(14.0-17.3) | 37.5%(36.2-38.7) | 32.0%(31.0-33.1) | 35.0%(33.5-36.4) | 9.3%(7.9-10.9)  | 28.0%(26.8-29.2) |
| p value for trend         |            | 0.7255           | 0.8968           | 0.4410           | 0.1857           | 0.2672          | 0.4490           |
| Gender                    |            |                  |                  |                  |                  |                 |                  |
|                           | Boys       | 16.8%(15.6-18.0) | 39.8%(39.0-40.7) | 34.6%(33.8-35.3) | 36.2%(35.4-37.1) | 10.1%(9.2-11.0) | 29.3%(28.6-30.0) |
|                           | Girls      | 15.2%(14.1-16.4) | 35.5%(34.7-36.4) | 30.6%(29.9-31.4) | 32.5%(31.7-33.4) | 8.9%(8.0-9.8)   | 26.1%(25.4-26.8) |
| p value for difference    |            | 0.0682           | <0.0001          | <0.0001          | <0.0001          | 0.0641          | <0.0001          |
| Urbanisation              |            |                  |                  |                  |                  |                 |                  |
|                           | Urban      | 16.2%(15.2-17.2) | 38.7%(38.0-39.5) | 33.7%(33.1-34.3) | 34.0%(33.4-34.7) | 9.3%(8.6-10.0)  | 27.6%(27.1-28.2) |
|                           | Suburb     | 15.8%(14.1-17.7) | 35.4%(34.1-36.8) | 30.6%(29.4-31.7) | 36.5%(34.9-38.1) | 10.6%(9.0-12.3) | 29.2%(27.9-30.5) |
|                           | Rural      | 13.2%(10.1-16.8) | 30.5%(27.0-34.1) | 23.6%(21.1-26.2) | 36.1%(32.5-39.9) | 9.6%(7.0-12.7)  | 25.6%(23.0-28.2) |
| p value for difference    |            | 0.2712           | <0.0001          | <0.0001          | 0.0108           | 0.3197          | 0.0169           |
| Duration of breastfeeding |            |                  |                  |                  |                  |                 |                  |
|                           | < 6 months | 17.2%(15.9-18.5) | 40.5%(39.6-41.4) | 35.4%(34.7-36.2) | 36.2%(35.2-37.2) | 9.8%(8.7-10.9)  | 29.5%(28.7-30.3) |
|                           | ≥ 6 months | 15.0%(13.9-16.2) | 35.0%(34.1-35.9) | 30.0%(29.3-30.8) | 33.4%(32.6-34.2) | 9.3%(8.6-10.1)  | 26.7%(26.1-27.4) |
| p value for difference    |            | 0.0117           | <0.0001          | <0.0001          | <0.0001          | 0.5074          | <0.0001          |
| Premature birth           |            |                  |                  |                  |                  |                 |                  |
|                           | Yes        | 16.0%(12.2-20.5) | 41.2%(38.1-44.4) | 32.6%(32.1-33.1) | 44.0%(39.6-48.5) | 11.0%(6.4-17.1) | 36.2%(32.5-40.0) |
|                           | No         | 16.0%(15.2-16.9) | 37.6%(37.0-38.3) | 34.9%(32.3-37.6) | 34.3%(33.6-34.9) | 9.5%(8.7-10.1)  | 27.6%(27.1-28.1) |
| p value for difference    |            | 1.0000           | 0.0278           | 0.0922           | <0.0001          | 0.6409          | <0.0001          |
| Birth weight (g)          |            |                  |                  |                  |                  |                 |                  |
|                           | <2500      | 15.7%(11.8-20.2) | 41.2%(38.1-44.3) | 34.9%(32.3-37.6) | 41.8%(38.3-45.2) | 8.5%(5.7-12.1)  | 32.3%(29.6-35.1) |



|                                          |                   |                  |                  |                  |                  |                  |                  |
|------------------------------------------|-------------------|------------------|------------------|------------------|------------------|------------------|------------------|
|                                          | 2500-4000         | 16.0%(15.1-16.9) | 37.9%(37.2-38.5) | 32.8%(32.2-33.3) | 34.3%(33.6-35.0) | 9.5%(8.8-10.2)   | 27.8%(27.3-28.4) |
|                                          | ≥ 4000            | 16.3%(13.2-19.8) | 34.6%(32.2-36.9) | 30.3%(28.4-32.3) | 34.0%(32.5-35.5) | 9.7%(8.3-11.3)   | 26.9%(25.7-28.0) |
| p value for trend                        |                   | 0.8207           | 0.0005           | 0.0036           | 0.0111           | 0.5785           | 0.0030           |
| Parental smoking                         |                   |                  |                  |                  |                  |                  |                  |
|                                          | None              | 14.4%(13.4-15.6) | 36.8%(36.0-37.6) | 31.6%(30.9-32.3) | 32.6%(31.9-33.3) | 8.5%(7.8-9.2)    | 25.9%(25.4-26.5) |
|                                          | One               | 17.9%(16.6-19.3) | 38.9%(38.0-39.8) | 33.9%(33.1-34.7) | 38.9%(37.7-40.1) | 12.2%(10.8-13.6) | 32.3%(31.3-33.3) |
|                                          | Two               | 13.1%(5.3-25.3)  | 42.8%(33.9-52.0) | 34.3%(27.3-41.8) | 36.7%(26.3-48.0) | 21.4%(9.5-38.2)  | 31.6%(23.4-40.8) |
| p value for trend                        |                   | 0.0002           | 0.0004           | <0.0001          | <0.0001          | <0.0001          | <0.0001          |
| History of parental asthma               |                   |                  |                  |                  |                  |                  |                  |
|                                          | None              | 15.7%(14.9-16.6) | 37.5%(36.9-38.1) | 32.3%(31.8-32.9) | 34.2%(33.5-34.8) | 9.4%(8.8-10.0)   | 27.5%(27.0-28.0) |
|                                          | One               | 31.6%(24.1-39.8) | 46.2%(42.6-49.8) | 43.9%(40.6-47.1) | 47.7%(43.4-52.0) | 17.4%(11.1-25.2) | 42.2%(38.4-46.0) |
|                                          | Two               | 0(0-60.2)        | 53.7%(29.2-77.0) | 49.1%(27.5-71.0) | 24.3%(15.2-35.6) | 5.6%(0.0-38.9)   | 22.3%(13.9-32.6) |
| p value for trend                        |                   | <0.0001          | <0.0001          | <0.0001          | <0.0001          | 0.0165           | <0.0001          |
| History of parental allergy              |                   |                  |                  |                  |                  |                  |                  |
|                                          | None              | 15.2%(14.4-16.1) | 36.6%(36.0-37.3) | 31.4%(30.8-31.9) | 31.7%(31.0-32.4) | 8.8%(8.2-9.5)    | 24.8%(24.2-25.3) |
|                                          | One               | 27.3%(22.8-32.2) | 46.1%(44.1-48.0) | 43.8%(42.0-45.6) | 39.8%(38.6-41.0) | 11.3%(9.7-13.0)  | 34.5%(33.5-35.6) |
|                                          | Two               | 36.9%(22.7-52.9) | 50.7%(44.5-56.9) | 48.6%(42.9-54.4) | 41.5%(38.7-44.3) | 16.8%(12.3-22.0) | 37.3%(34.8-39.8) |
| p value for trend                        |                   | <0.0001          | <0.0001          | <0.0001          | <0.0001          | <0.0001          | <0.0001          |
| Residence area                           |                   |                  |                  |                  |                  |                  |                  |
|                                          | <75m <sup>2</sup> | 15.8%(14.5-17.1) | 37.5%(36.5-38.5) | 32.1%(31.2-32.9) | 33.5%(32.3-34.8) | 10.3%(9.0-11.7)  | 27.3%(26.3-28.3) |
|                                          | ≥75m <sup>2</sup> | 16.2%(15.1-17.3) | 37.9%(37.1-38.7) | 33.1%(32.4-33.8) | 34.7%(34.0-35.5) | 9.3%(8.6-10.0)   | 27.9%(27.4-28.5) |
| p value for difference                   |                   | 0.7040           | 0.5652           | 0.0609           | 0.1009           | 0.1722           | 0.2811           |
| Frequency of putting bedding to sunshine |                   |                  |                  |                  |                  |                  |                  |
|                                          | Never             | 20.3%(15.5-25.7) | 41.5%(37.9-45.1) | 36.2%(33.2-39.2) | 37.1%(32.8-41.6) | 9.0%(6.3-12.5)   | 25.1%(22.2-28.2) |

|                                      |                      |                  |                  |                  |                  |                  |                  |
|--------------------------------------|----------------------|------------------|------------------|------------------|------------------|------------------|------------------|
|                                      | Sometimes            | 18.0%(16.3-19.8) | 40.1%(39.0-41.2) | 35.6%(34.7-36.6) | 36.7%(35.7-37.7) | 11.4%(10.2-12.7) | 30.7%(29.9-31.6) |
|                                      | Often                | 14.9%(14.0-16.0) | 36.3%(35.6-37.1) | 31.0%(30.4-31.6) | 33.1%(32.3-33.8) | 8.7%(7.9-9.4)    | 26.3%(25.7-26.9) |
| p value for trend                    |                      | 0.0002           | <0.0001          | <0.0001          | <0.0001          | 0.0032           | <0.0001          |
| Frequency of clean children's rooms  |                      |                  |                  |                  |                  |                  |                  |
|                                      | Rarely               | 11.0%(6.0-18.0)  | 39.0%(33.6-44.6) | 30.8%(26.5-35.4) | 36.6%(32.8-40.5) | 8.3%(4.8-13.1)   | 29.8%(26.7-33.0) |
|                                      | Sometimes            | 14.8%(12.6-17.2) | 39.1%(37.5-40.6) | 34.4%(33.1-35.8) | 36.0%(34.6-37.4) | 10.2%(8.6-11.9)  | 30.1%(29.0-31.3) |
|                                      | Often                | 16.3%(15.4-17.3) | 37.5%(36.8-38.2) | 32.4%(31.8-33.0) | 34.0%(33.3-34.7) | 9.5%(8.8-10.2)   | 27.2%(26.6-27.7) |
| p value for trend                    |                      | 0.0669           | 0.0659           | 0.0533           | 0.0084           | 0.8033           | <0.0001          |
| Cooking fuel type                    |                      |                  |                  |                  |                  |                  |                  |
|                                      | Natural gas/coal gas | 16.3%(15.3-17.4) | 38.3%(37.6-39.0) | 33.4%(32.8-34.0) | 34.6%(34.0-35.2) | 9.6%(9.0-10.3)   | 28.1%(27.6-28.6) |
|                                      | Coal                 | 15.5%(12.5-19.1) | 40.3%(37.8-42.9) | 33.9%(31.8-36.1) | 45.3%(33.1-58.0) | 25.1%(12.7-41.3) | 36.9%(27.8-46.8) |
|                                      | Electricity          | 15.0%(13.1-17.2) | 32.9%(31.1-34.6) | 27.6%(26.2-29.0) | 32.3%(29.4-35.4) | 7.8%(5.6-10.5)   | 24.0%(21.8-26.2) |
|                                      | Wood                 | 13.5%(6.2-24.5)  | 33.5%(25.2-42.7) | 25.8%(19.7-32.8) | 38.9%(9.2-76.6)  | 0.0%(0.0-45.9)   | 29.2%(8.7-58.7)  |
|                                      | Other                | 15.6%(11.8-20.0) | 40.4%(37.4-43.3) | 34.9%(32.4-37.5) | 18.2%(10.5-28.2) | 5.9%(2.4-11.8)   | 11.0%(7.0-16.2)  |
| p value for difference               |                      |                  |                  | <0.0001          | 0.0041           | 0.0038           | <0.0001          |
| Indoor dampness                      |                      |                  |                  |                  |                  |                  |                  |
|                                      | Yes                  | 21.2%(18.3-24.3) | 43.5%(41.8-45.2) | 39.5%(38.0-41.0) | 39.6%(38.0-41.2) | 11.4%(9.5-13.6)  | 33.9%(32.5-35.2) |
|                                      | No                   | 15.4%(14.6-16.3) | 36.9%(36.2-37.5) | 31.7%(31.1-32.2) | 33.5%(32.9-34.2) | 9.3%(8.6-9.9)    | 26.8%(26.3-27.3) |
| p value for difference               |                      | <0.0001          | <0.0001          | <0.0001          | <0.0001          | 0.0349           | <0.0001          |
| Home interior decoration             |                      |                  |                  |                  |                  |                  |                  |
|                                      | Yes                  | 16.9%(14.7-19.4) | 40.3%(38.8-41.7) | 35.9%(34.6-37.2) | 32.2%(30.4-34.1) | 9.0%(7.2-11.1)   | 26.2%(24.7-27.7) |
|                                      | No                   | 15.8%(14.9-16.7) | 37.2%(36.5-37.9) | 32.0%(31.4-32.6) | 34.7%(34.1-35.4) | 9.5%(8.9-10.2)   | 28.0%(27.4-28.5) |
| p value for difference               |                      | 0.3613           | 0.0002           | 0.0001           | 0.0128           | 0.6091           | 0.0265           |
| Home interior purchase new furniture |                      |                  |                  |                  |                  |                  |                  |

|                         |                                     |                  |                  |                  |                  |                  |                  |
|-------------------------|-------------------------------------|------------------|------------------|------------------|------------------|------------------|------------------|
|                         | Yes                                 | 17.6%(16.0-19.2) | 38.8%(37.8-39.9) | 31.7%(31.0-32.3) | 33.4%(32.1-34.7) | 8.8%(7.5-10.2)   | 27.3%(26.2-28.4) |
|                         | No                                  | 15.4%(14.4-16.4) | 37.2%(36.4-37.9) | 34.6%(33.7-35.5) | 34.7%(34.0-35.4) | 9.6%(9.0-10.4)   | 27.9%(27.3-28.4) |
| p value for difference  |                                     | 0.0234           | 0.0102           | <0.0001          | 0.0803           | 0.2884           | 0.3308           |
| Wall painting materials |                                     |                  |                  |                  |                  |                  |                  |
|                         | Wall paper                          | 14.4%(12.0-17.2) | 38.1%(36.1-40.1) | 32.3%(30.6-34.0) | 34.4%(33.1-35.6) | 9.1%(7.9-10.4)   | 27.3%(26.3-28.3) |
|                         | Emulsion paint                      | 17.2%(16.0-18.5) | 38.3%(37.5-39.1) | 33.8%(33.1-34.5) | 34.5%(33.6-35.5) | 9.5%(8.4-10.6)   | 29.1%(28.3-29.9) |
|                         | Paint                               | 15.9%(13.4-18.7) | 40.9%(39.1-42.8) | 35.6%(34.0-37.2) | 35.1%(31.1-39.3) | 11.0%(7.9-10.4)  | 27.7%(24.6-31.0) |
|                         | Wood                                | 6.5%(2.9-12.2)   | 34.0%(27.4-41.0) | 23.0%(18.6-27.9) | 22.7%(15.0-32.1) | 5.6%(2.1-12.0)   | 14.5%(10.0-20.1) |
|                         | Lime / cement                       | 15.2%(13.3-17.2) | 34.0%(32.4-35.6) | 28.6%(27.3-29.9) | 33.2%(28.7-37.8) | 10.7%(7.3-15.0)  | 24.4%(21.3-27.7) |
|                         | Other                               | 14.0%(11.1-17.3) | 35.8%(33.0-38.6) | 28.9%(26.7-31.1) | 34.6%(33.5-35.8) | 9.8% (8.8-11.0)  | 27.0%(26.1-27.9) |
| p value for difference  |                                     | 0.0055           | <0.0001          | <0.0001          | 0.2389           | 0.6140           | <0.0001          |
| Flooring materials      |                                     |                  |                  |                  |                  |                  |                  |
|                         | Solid wood / multi-layer solid wood | 16.1%(14.9-17.3) | 37.1%(36.2-38.0) | 32.1%(31.4-32.9) | 34.3%(33.3-35.3) | 9.0% (8.0-10.0)  | 27.2%(26.4-27.9) |
|                         | Laminate / Composite wood           | 19.0%(16.8-21.3) | 40.7%(39.4-42.0) | 37.0%(35.9-38.1) | 35.7%(34.6-36.7) | 9.4% (8.3-10.7)  | 29.8%(28.9-30.7) |
|                         | Bamboo                              | 16.3%(9.7-25.0)  | 33.5%(28.5-38.8) | 30.0%(25.8-34.5) | 31.1%(24.5-38.2) | 9.9% (4.7-17.9)  | 23.9%(19.0-29.3) |
|                         | Ceramic tile / stone / cement       | 14.8%(13.3-16.4) | 36.2%(35.0-37.4) | 30.4%(29.4-31.4) | 33.6%(32.4-34.8) | 10.5% (9.3-11.8) | 26.9%(25.9-27.8) |
|                         | PVC / plastics / plastic leather    | 22.3%(14.5-32.0) | 31.4%(36.1-37.0) | 28.9%(24.5-33.7) | 41.3%(29.3-54.9) | 4.8%(1.0-16.7)   | 27.9%(19.4-37.6) |
|                         | Other                               | 12.7%(8.3-18.3)  | 40.5%(35.2-46.0) | 30.9%(26.9-35.0) | 27.6%(23.1-32.5) | 10.3%(4.5-15.4)  | 21.7%(18.3-25.3) |
| p value for difference  |                                     | 0.0137           | <0.0001          | <0.0001          | 0.0041           | 0.4183           | <0.0001          |
| Indoor heating mode     |                                     |                  |                  |                  |                  |                  |                  |
|                         | No heating                          | 16.2%(14.0-18.5) | 36.2%(34.4-37.9) | 31.0%(29.5-32.4) | 34.4%(33.3-35.6) | 8.1%(7.0-9.2)    | 27.5%(26.6-28.4) |
|                         | Individual household heating        | 16.5%(15.4-17.6) | 37.2%(36.4-37.9) | 32.4%(31.8-33.1) | 34.5%(33.6-35.4) | 10.3%(9.3-11.3)  | 28.7%(27.9-29.4) |
|                         | Central heating                     | 16.5%(14.6-18.4) | 41.4%(40.0-42.7) | 35.7%(34.5-36.9) | 34.4%(33.1-35.7) | 9.5%(8.3-10.8)   | 26.7%(25.6-27.7) |
|                         | Other                               | 9.9%(5.9-15.2)   | 37.5%(32.5-42.6) | 29.1%(25.3-33.1) | 34.5%(31.1-38.0) | 10.6%(7.8-14.0)  | 25.7%(23.2-28.3) |
| p value for difference  |                                     | 0.1347           | <0.0001          | <0.0001          | 0.9986           | 0.0290           | 0.0052           |

|                             |                        |                  |                  |                  |                  |                  |                  |
|-----------------------------|------------------------|------------------|------------------|------------------|------------------|------------------|------------------|
| Indoor use air-conditioning |                        |                  |                  |                  |                  |                  |                  |
|                             | Yes                    | 15.6%(14.6-16.7) | 36.9%(36.1-37.6) | 33.4%(32.5-34.3) | 34.2%(33.5-34.9) | 9.5%(8.7-10.2)   | 28.1%(27.5-28.6) |
|                             | No                     | 16.8%(15.4-18.3) | 39.4%(38.3-40.6) | 32.2%(31.6-32.8) | 35.7%(34.2-37.1) | 9.6%(8.4-10.9)   | 26.6%(25.5-27.7) |
|                             | p value for difference | 0.1636           | 0.0001           | 0.0327           | 0.0765           | 0.8745           | 0.0193           |
| Indoor use air purifier     |                        |                  |                  |                  |                  |                  |                  |
|                             | Yes                    | 19.0%(15.0-23.6) | 38.9%(36.3-41.6) | 34.7%(32.4-37.1) | 35.4%(34.4-36.4) | 8.2%(7.3-9.2)    | 28.3%(27.5-29.1) |
|                             | No                     | 15.9%(15.0-16.7) | 37.7%(37.1-38.3) | 32.6%(32.0-33.1) | 34.0%(33.2-34.8) | 10.2%(9.5-11.1)  | 27.6%(26.9-28.2) |
|                             | p value for difference | 0.1352           | 0.3988           | 0.0780           | 0.0293           | 0.0023           | 0.1681           |
| Indoor keeping furry pets   |                        |                  |                  |                  |                  |                  |                  |
|                             | Yes                    | 19.5%(16.9-22.1) | 36.4%(34.6-38.3) | 32.1%(30.6-33.7) | 35.6%(33.8-37.4) | 11.1%(9.2-13.3)  | 29.4%(28.0-30.9) |
|                             | No                     | 15.6%(14.7-16.5) | 38.0%(37.3-38.6) | 32.8%(32.3-33.4) | 34.3%(33.7-35.0) | 9.3%(8.7-10.0)   | 27.6%(27.1-28.1) |
|                             | p value for difference | 0.0033           | 0.1256           | 0.4220           | 0.2041           | 0.0773           | 0.0179           |
| Asthma                      |                        |                  |                  |                  |                  |                  |                  |
|                             | Yes                    | 52.6%(46.4-58.7) | 63.4%(61.4-65.4) | 62.2%(60.3-64.1) | 61.4%(58.4-64.3) | 42.6%(33.5-52.1) | 59.5%(56.6-62.2) |
|                             | No                     | 14.8%(14.0-15.7) | 35.3%(34.7-35.9) | 30.3%(29.8-30.8) | 33.1%(32.5-33.8) | 9.0%(8.4-10.0)   | 26.5%(26.0-27.0) |
|                             | p value for difference | <0.0001          | <0.0001          | <0.0001          | <0.0001          | <0.0001          | <0.0001          |
| Allergic rhinitis           |                        |                  |                  |                  |                  |                  |                  |
|                             | Yes                    | 26.4%(22.0-31.1) | 50.6%(48.8-52.5) | 47.6%(45.9-49.4) | 47.3%(45.6-49.0) | 19.8%(16.2-23.8) | 44.1%(42.5-45.7) |
|                             | No                     | 15.5%(14.7-16.4) | 36.2%(35.5-36.8) | 31.1%(30.6-31.6) | 32.4%(31.7-33.0) | 9.0%(8.4-9.6)    | 25.6%(25.1-26.2) |
|                             | p value for difference | <0.0001          | <0.0001          | <0.0001          | <0.0001          | <0.0001          | <0.0001          |
| Wheezing                    |                        |                  |                  |                  |                  |                  |                  |
|                             | Yes                    | 29.4%(26.9-32.0) | 50.3%(49.1-51.5) | 47.1%(46.0-48.2) | 60.2%(58.0-62.3) | 31.5%(25.2-38.4) | 57.3%(55.2-59.4) |
|                             | No                     | 13.9%(13.0-14.8) | 33.5%(32.8-34.2) | 28.4%(27.8-29.0) | 32.0%(31.4-32.7) | 9.0%(8.3-9.6)    | 25.6%(25.1-26.1) |
|                             | p value for difference | <0.0001          | <0.0001          | <0.0001          | <0.0001          | <0.0001          | <0.0001          |

Values are % (95% CI). p value for difference refers to the comparison of binary variables. Pneumonia, asthma, allergic rhinitis were defined as

physician-diagnosed since birth of children. Wheezing was defined as parents reported that the child has great difficulty breathing or the respiratory muscles of the child are all involved in breathing, and the respiratory rate of the child is faster than normal since birth. Premature birth was defined as delivery under 37 weeks of pregnancy. Used antibiotics was defined as child has been injected or taken since birth, such as but not limited to penicillin, azithromycin, cephalosporin, etc. Parental smoking was defined as parents smoked equal to or more than 100 cigarettes in the lifetime. All calculations of p values are weighted, accounting for the number of people sampled in two surveys in 2011 and 2019 and based on the  $\chi^2$  test.
